# Supplementary material
Source: PubMed Central journal article supplement (PMC11348836)
Supplement: NIHMS1506502-supplement-Supporting_Information.pdf [file NIHMS1506502-supplement-Supporting_Information.pdf]

# Semiempirical Configuration Interaction Calculations for Ru–Centered Dyes *Supporting Information*

Lisa A. Fredin and Thomas C. Allison\*

January 8, 2018

## Contents

|          |                                 |            |
|----------|---------------------------------|------------|
| <b>1</b> | <b>Effect of Geometry on CI</b> | <b>S2</b>  |
| <b>2</b> | <b>CI Active Space</b>          | <b>S5</b>  |
| <b>3</b> | <b>Basis Set</b>                | <b>S6</b>  |
| <b>4</b> | <b>MOPAC headers</b>            | <b>S7</b>  |
| <b>5</b> | <b>Optimized Structures</b>     | <b>S7</b>  |
| <b>6</b> | <b>Additional Structures</b>    | <b>S28</b> |

---

\*Chemical Informatics Research Group, Chemical Science Division, Material Measurement Laboratory, National Institute of Standards and Technology, 100 Bureau Drive, Stop 8320, Gaithersburg, Maryland, 20899-8320, USA

# 1 Effect of Geometry on CI

Previously we showed that small changes in molecular structure changed the calculated TDDFT absorption spectrum.<sup>40</sup> To investigate this further, we have explored the calculated PM6scCI transitions (Figure S1) and the Boltzmann weighted sum (Figure S2) of the breathing mode of a complex which has been shown to be one of the dominant modes in the deactivation of the initial photoexcited state.

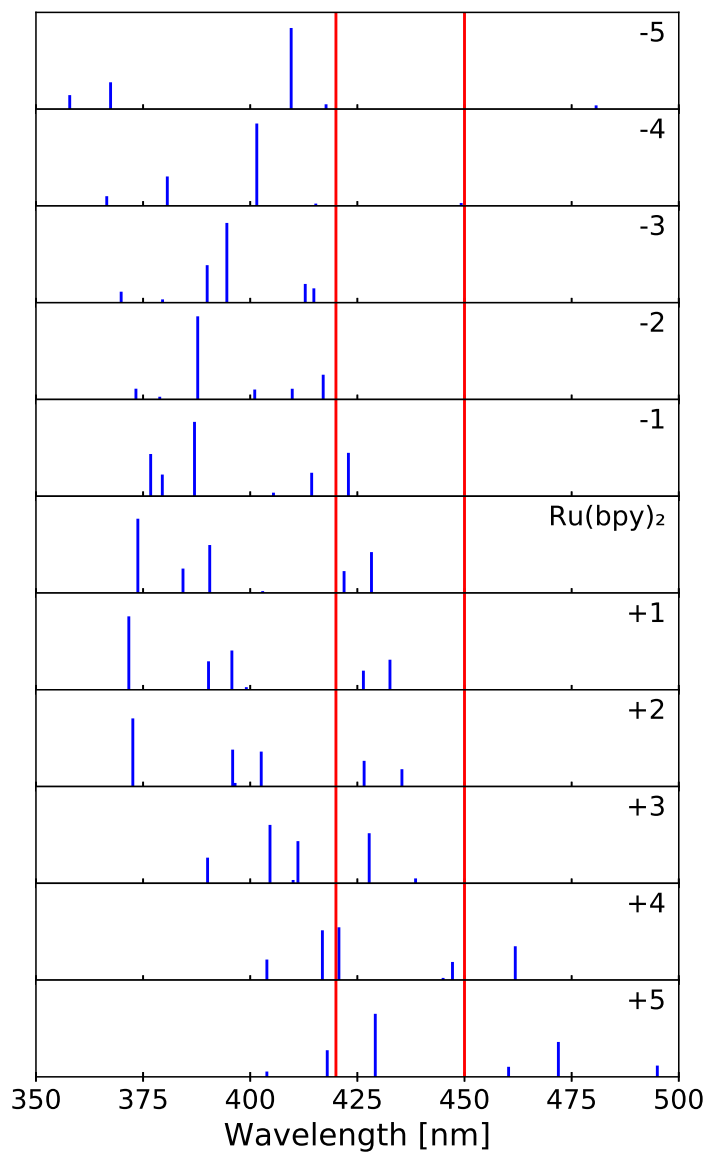

Figure S1: Comparison of calculated PM6scCI transitions at  $\pm$  the number of steps indicated along the breathing mode of  $\text{Ru}(\text{BPy})_2$  as calculated at the PBE0/6-31G(d,p)[C,N,H]SDD[Ru]—PCM(MeCN) level of theory. The experimental maxima are shown in red for reference.

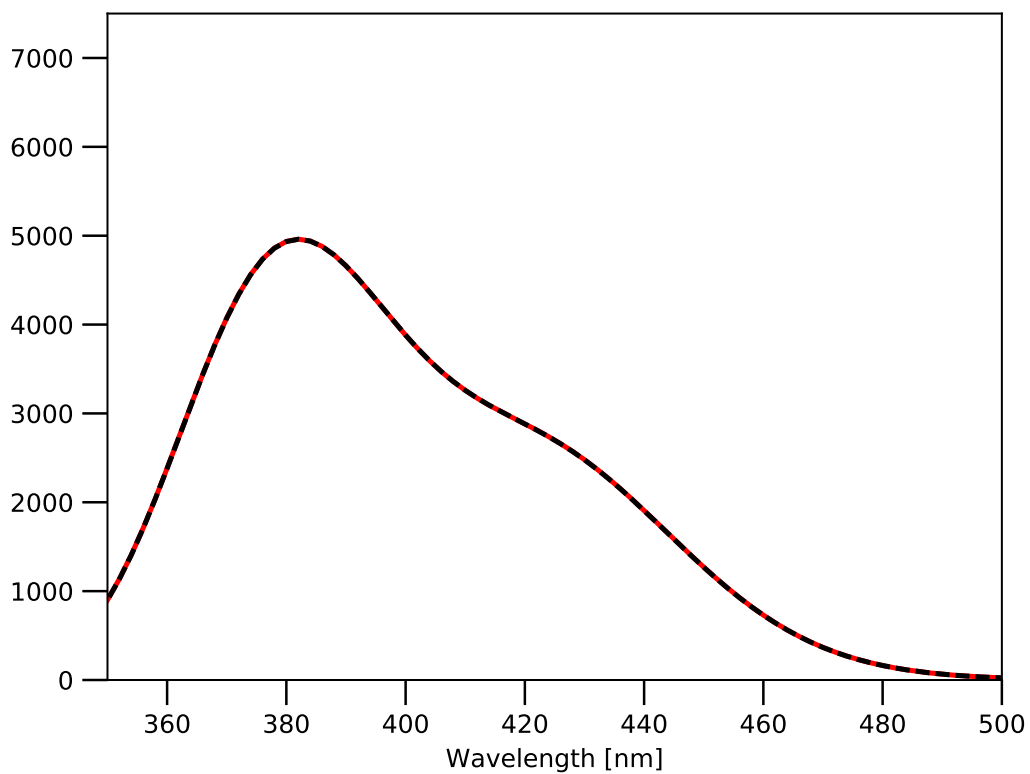

Figure S2: Comparison of PM6scCI calculated UV/Vis spectrum of the DFT optimized geometry minimum (red) and the Boltzmann weighted sum (dashed black line) at 10 steps along the breathing mode of  $\text{Ru}(\text{BPy})_2$  as calculated at the PBE0/6-31G(d,p)[C,N,H]SDD[Ru]—PCM(MeCN) level of theory.

## 2 CI Active Space

An active space of 5 molecular orbitals with 2 doubly occupied orbitals was used for parameterization of the CI model and for subsequent calculations. In MOPAC, this active space is specified using the keyword `c.i.=(5,2)`. This is a somewhat small active space, and while it is consistent with the semiempirical philosophy to use a smaller active space, there is a legitimate question as to whether a larger active space would have a significant impact on the results. To assess the effect of larger active spaces on the results, calculations of the UV/Vis spectra were made using a number of different active spaces for two compounds,  $\text{ru}(\text{BPy})_2$  and  $\text{Ru}(\text{TPy})_2$ . The same set of CI parameters was used for all calculations as described in the section on MOPAC headers below. The results of these calculations are depicted in figures S3 and S4 below. It is clearly seen that the results from the many different active spaces are quite similar. Larger active spaces tend to add some higher energy states, but the energies seen up to 3.5 eV are quite similar. This is an indication that the size of the active space does not strongly affect the results and that the (5,2) active space used for parameterization and calculation is adequate for the intended purpose.

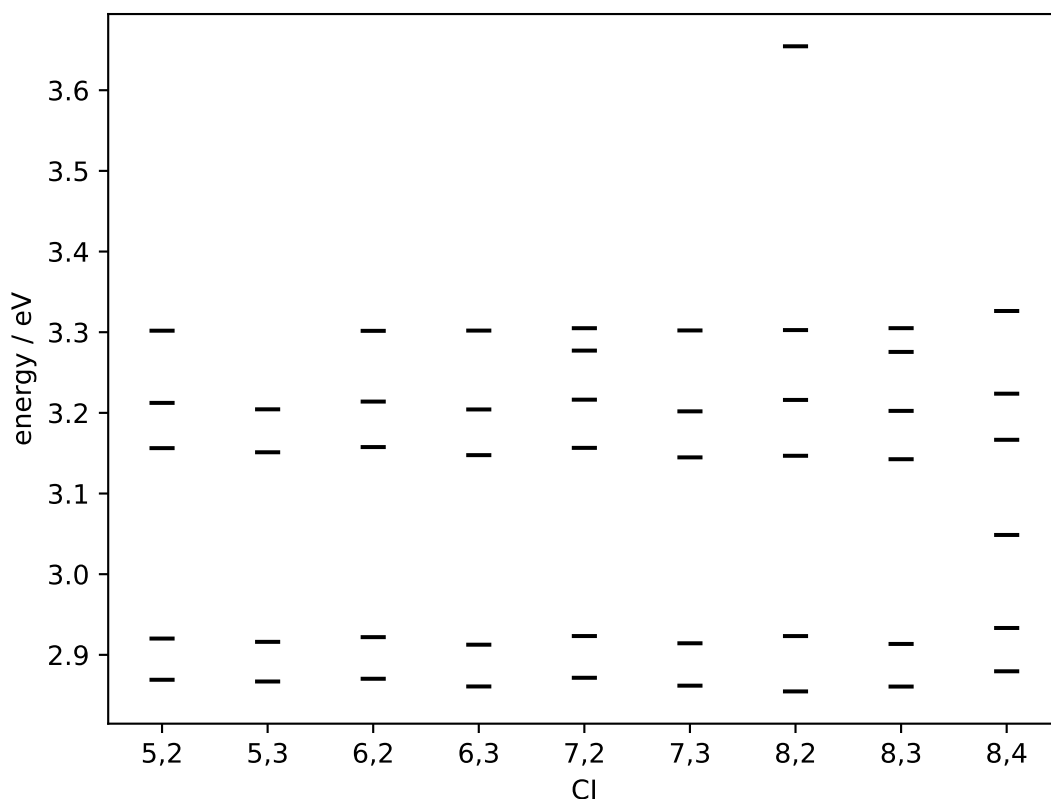

Figure S3: Plot of CI energies for the indicated active spaces for  $\text{Ru}(\text{BPy})_2$ .

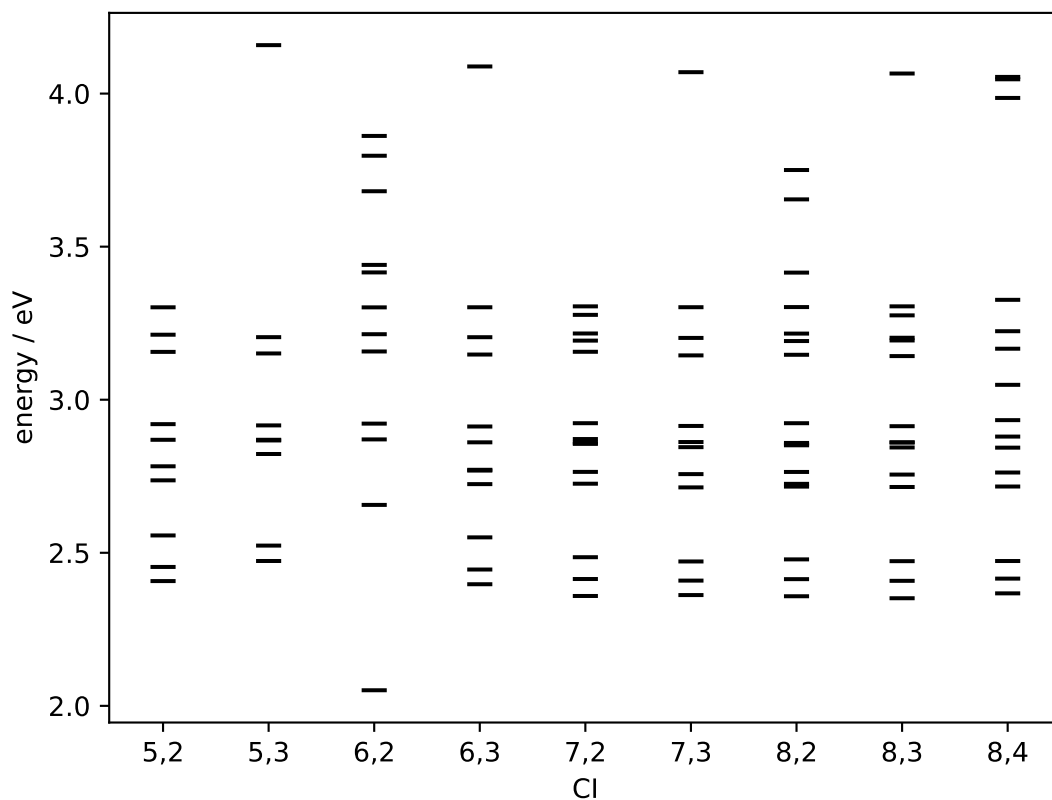

Figure S4: Plot of CI energies for the indicated active spaces for Ru(TPy)<sub>2</sub>.

### 3 Basis Set

The PM6 basis set parameters for Ru are presented in a format suitable for use in MOPAC below (called rRu.basis in headers).

```

USS      Ru      -44.90152100
UPP      Ru      -41.42440900
UDD      Ru      -37.93451400
ZS       Ru       1.45919500
ZP       Ru       5.53720100
ZD       Ru       2.09316400
BETAS    Ru      -12.85950800
BETAP    Ru      -8.47551800
BETAD    Ru      -3.83079700
GSS      Ru       4.41364279
GPP      Ru      22.49044761
GSP      Ru       5.35699582

```

|         |    |             |
|---------|----|-------------|
| GP2     | Ru | 19.59995666 |
| HSP     | Ru | 0.00805809  |
| ZSN     | Ru | 0.98444900  |
| ZPN     | Ru | 4.58661300  |
| ZDN     | Ru | 0.76533200  |
| FOSD    | Ru | 5.91740400  |
| G2SD    | Ru | 5.85973800  |
| ALPB_H  | Ru | 2.89201896  |
| XFAC_H  | Ru | 7.14609528  |
| ALPB_C  | Ru | 2.78870566  |
| XFAC_C  | Ru | 1.09168381  |
| ALPB_N  | Ru | 3.10082239  |
| XFAC_N  | Ru | 2.32425209  |
| ALPB_RU | Ru | 0.57205600  |
| XFAC_RU | Ru | 0.09780500  |

## 4 MOPAC headers

The MOPAC keywords used for PM6 structural optimization using basis set rRu where the molecular charge replaces XX:

```
pm6 opt bfgs gnorm=1.0 scfcrt=1e-8 charge=XX external=rRu.basis
```

The MOPAC keywords used for PM6scCI using basis set rRu where the molecular charge replaces XX:

```
pm6 1scf charge=XX c.i.=(5,2) cisd meci external=rRu.basis jscale +
fss=1.0097 fsp=1.0182 fsd=1.0009 fpp=1.0082 fpd=1.0090 fdd=0.9844
```

Note that the input keywords `jscale`, `fss`, `fsp`, `fsd`, `fpp`, `fpd`, and `fdd` are enabled by our modifications to the MOPAC source code and will not work with the default version of MOPAC.

## 5 Optimized Structures

Cartesian coordinates of optimized geometries at the PM6/rRu level of theory for 13 Ru-containing light harvesting dyes are presented below.

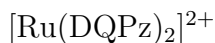

|   |   |          |           |           |
|---|---|----------|-----------|-----------|
| 1 | C | 2.894912 | -0.914317 | -3.145804 |
| 2 | C | 3.909967 | -0.007076 | -2.994490 |
| 3 | C | 3.741208 | 1.097759  | -2.096879 |
| 4 | C | 2.501522 | 1.237132  | -1.400377 |
| 5 | C | 1.727648 | -0.786597 | -2.335866 |
| 6 | H | 5.736776 | 1.907163  | -2.433357 |

|    |   |           |           |           |
|----|---|-----------|-----------|-----------|
| 7  | H | 2.963330  | -1.743015 | -3.857189 |
| 8  | H | 4.845661  | -0.097193 | -3.558068 |
| 9  | C | 4.785755  | 2.051409  | -1.908524 |
| 10 | C | 2.283767  | 2.466347  | -0.669447 |
| 11 | H | 0.925563  | -1.541986 | -2.415273 |
| 12 | C | 3.333860  | 3.351800  | -0.473381 |
| 13 | C | 4.595505  | 3.131975  | -1.083140 |
| 14 | H | 3.211140  | 4.256660  | 0.132207  |
| 15 | H | 5.400416  | 3.855235  | -0.905032 |
| 16 | C | -4.703966 | 2.758596  | 1.609451  |
| 17 | C | -4.807915 | 1.569281  | 2.285728  |
| 18 | C | -3.706624 | 0.660140  | 2.312375  |
| 19 | C | -2.511306 | 0.959771  | 1.589315  |
| 20 | C | -2.377482 | 2.275481  | 1.005933  |
| 21 | C | -3.477770 | 3.120743  | 0.994361  |
| 22 | H | -4.687199 | -0.763758 | 3.650281  |
| 23 | H | -5.547674 | 3.455598  | 1.561457  |
| 24 | H | -5.727854 | 1.302082  | 2.816147  |
| 25 | C | -3.780110 | -0.548972 | 3.074462  |
| 26 | H | -3.414690 | 4.108903  | 0.525375  |
| 27 | C | -1.584466 | -1.106128 | 2.261584  |
| 28 | C | -2.708327 | -1.403480 | 3.084544  |
| 29 | H | -0.738972 | -1.814413 | 2.234462  |
| 30 | H | -2.702345 | -2.313243 | 3.690843  |
| 31 | C | -0.746865 | 4.198309  | 0.389196  |
| 32 | C | 0.556390  | 4.232282  | -0.073003 |
| 33 | H | -1.376358 | 5.042743  | 0.618934  |
| 34 | H | 1.184198  | 5.076761  | -0.320112 |
| 35 | N | 1.538063  | 0.212712  | -1.456600 |
| 36 | N | -1.486727 | -0.003079 | 1.496704  |
| 37 | C | -2.709560 | 1.404128  | -3.082190 |
| 38 | C | -3.783248 | 0.552173  | -3.070823 |
| 39 | C | -3.710115 | -0.657635 | -2.309518 |
| 40 | C | -2.513790 | -0.959707 | -1.588946 |
| 41 | C | -1.585336 | 1.105275  | -2.259956 |
| 42 | H | -5.731245 | -1.299482 | -2.812931 |
| 43 | H | -2.702162 | 2.313596  | -3.688921 |
| 44 | H | -4.690708 | 0.768609  | -3.645325 |
| 45 | C | -4.811029 | -1.567065 | -2.283832 |
| 46 | C | -2.378793 | -2.276346 | -1.008764 |
| 47 | H | -0.739512 | 1.813133  | -2.233387 |
| 48 | C | -3.478985 | -3.121461 | -0.997479 |
| 49 | C | -4.705711 | -2.758144 | -1.610820 |
| 50 | H | -3.415521 | -4.110367 | -0.530234 |
| 51 | H | -5.548739 | -3.456107 | -1.564502 |



|    |    |           |           |           |
|----|----|-----------|-----------|-----------|
| 52 | C  | 4.598428  | -3.131932 | 1.066461  |
| 53 | C  | 4.788385  | -2.054181 | 1.895851  |
| 54 | C  | 3.742304  | -1.103853 | 2.090756  |
| 55 | C  | 2.502563  | -1.242052 | 1.394218  |
| 56 | C  | 2.284525  | -2.469402 | 0.660587  |
| 57 | C  | 3.335598  | -3.352651 | 0.459665  |
| 58 | H  | 4.843952  | 0.082231  | 3.561112  |
| 59 | H  | 5.404354  | -3.852777 | 0.883445  |
| 60 | H  | 5.740303  | -1.910345 | 2.419533  |
| 61 | C  | 3.908828  | -0.004811 | 2.996191  |
| 62 | H  | 3.212736  | -4.256362 | -0.147443 |
| 63 | C  | 1.726520  | 0.776377  | 2.339777  |
| 64 | C  | 2.892365  | 0.899527  | 3.153078  |
| 65 | H  | 0.924113  | 1.531759  | 2.420782  |
| 66 | H  | 2.958178  | 1.723056  | 3.870822  |
| 67 | C  | 0.557717  | -4.235769 | 0.057598  |
| 68 | C  | -0.745698 | -4.200043 | -0.403997 |
| 69 | H  | 1.185553  | -5.081812 | 0.299634  |
| 70 | H  | -1.374813 | -5.043230 | -0.639170 |
| 71 | N  | -1.487622 | 0.001458  | -1.496512 |
| 72 | N  | 1.538111  | -0.218244 | 1.455320  |
| 73 | Ru | 0.030722  | -0.001540 | -0.000098 |
| 74 | N  | -0.036979 | -2.033609 | -0.153614 |
| 75 | N  | -0.035873 | 2.030916  | 0.151959  |
| 76 | C  | -1.105933 | 2.810540  | 0.521478  |
| 77 | C  | -1.106159 | -2.811837 | -0.527590 |
| 78 | N  | 0.981951  | 2.888621  | -0.211474 |
| 79 | N  | 0.982154  | -2.892415 | 0.204289  |

[Ru(BPy)<sub>3</sub>]<sup>2+</sup>

|    |   |           |           |           |
|----|---|-----------|-----------|-----------|
| 1  | C | -0.726717 | -2.907606 | 2.544753  |
| 2  | C | -2.068705 | -2.671772 | 2.861258  |
| 3  | C | -2.776172 | -1.694873 | 2.154599  |
| 4  | C | -2.125707 | -0.968878 | 1.142481  |
| 5  | C | -0.122256 | -2.157228 | 1.527036  |
| 6  | H | -0.151882 | -3.668137 | 3.084753  |
| 7  | H | 0.930051  | -2.311920 | 1.245992  |
| 8  | C | -3.856891 | 2.086018  | -1.252535 |
| 9  | C | -4.134875 | 0.450220  | 0.499475  |
| 10 | H | -4.255364 | 2.880750  | -1.892771 |
| 11 | H | -4.761778 | -0.047759 | 1.246095  |
| 12 | N | -0.796344 | -1.197132 | 0.826001  |
| 13 | C | 0.669884  | 2.952971  | 2.509700  |
| 14 | C | 2.009574  | 2.722980  | 2.840189  |

|    |    |           |           |           |
|----|----|-----------|-----------|-----------|
| 15 | C  | 2.723330  | 1.737093  | 2.152777  |
| 16 | C  | 2.081566  | 0.996609  | 1.145350  |
| 17 | C  | 0.074028  | 2.187758  | 1.498350  |
| 18 | H  | 0.089993  | 3.719985  | 3.034898  |
| 19 | H  | -0.976270 | 2.336513  | 1.207496  |
| 20 | C  | 3.834457  | -2.090585 | -1.191340 |
| 21 | C  | 4.097795  | -0.427313 | 0.536902  |
| 22 | H  | 4.238693  | -2.894702 | -1.816323 |
| 23 | H  | 4.718693  | 0.083509  | 1.279902  |
| 24 | N  | 0.754333  | 1.218758  | 0.815794  |
| 25 | Ru | -0.014215 | 0.000013  | -0.691814 |
| 26 | C  | 2.751740  | -0.064900 | 0.359276  |
| 27 | C  | 2.498812  | -1.691135 | -1.333170 |
| 28 | C  | -2.788509 | 0.082254  | 0.336251  |
| 29 | C  | -2.521005 | 1.682099  | -1.379100 |
| 30 | C  | 4.642264  | -1.449224 | -0.246316 |
| 31 | C  | -4.672198 | 1.460746  | -0.303355 |
| 32 | N  | -1.977709 | 0.695647  | -0.604951 |
| 33 | N  | 1.948445  | -0.693986 | -0.577990 |
| 34 | H  | 1.829925  | -2.168590 | -2.064388 |
| 35 | H  | 3.772242  | 1.545836  | 2.401205  |
| 36 | H  | -3.827050 | -1.499701 | 2.391912  |
| 37 | H  | -1.846322 | 2.147172  | -2.113274 |
| 38 | H  | 2.495660  | 3.308818  | 3.630212  |
| 39 | H  | 5.691474  | -1.743836 | -0.120405 |
| 40 | H  | -2.561501 | -3.246335 | 3.655251  |
| 41 | H  | -5.721688 | 1.758956  | -0.189275 |
| 42 | N  | -0.617232 | -1.186748 | -2.296230 |
| 43 | C  | -1.247295 | -2.396554 | -2.213882 |
| 44 | C  | -0.347762 | -0.674968 | -3.555233 |
| 45 | C  | -1.625846 | -3.125031 | -3.349516 |
| 46 | H  | -1.442129 | -2.771954 | -1.198380 |
| 47 | C  | -0.707421 | -1.367285 | -4.723913 |
| 48 | C  | -1.352857 | -2.602758 | -4.618151 |
| 49 | H  | -2.130997 | -4.091210 | -3.241285 |
| 50 | H  | -0.487585 | -0.946503 | -5.710279 |
| 51 | H  | -1.641832 | -3.155376 | -5.520596 |
| 52 | N  | 0.603018  | 1.164238  | -2.307782 |
| 53 | C  | 0.341946  | 0.635740  | -3.561622 |
| 54 | C  | 1.234162  | 2.374282  | -2.237373 |
| 55 | C  | 0.709916  | 1.312099  | -4.737014 |
| 56 | C  | 1.621318  | 3.087014  | -3.380152 |
| 57 | H  | 1.422524  | 2.763036  | -1.225684 |
| 58 | C  | 1.356009  | 2.548259  | -4.643543 |
| 59 | H  | 0.496181  | 0.878344  | -5.719260 |

|    |   |          |          |           |
|----|---|----------|----------|-----------|
| 60 | H | 2.127220 | 4.053835 | -3.281146 |
| 61 | H | 1.651545 | 3.088516 | -5.551411 |

[Ru(DQxP)<sub>2</sub>]<sup>2+</sup>

|    |    |           |           |           |
|----|----|-----------|-----------|-----------|
| 1  | C  | 0.014785  | 5.028136  | 0.008929  |
| 2  | C  | -1.109641 | 4.321081  | 0.425909  |
| 3  | C  | -1.101280 | 2.911309  | 0.394012  |
| 4  | C  | 1.119785  | 2.908676  | -0.394193 |
| 5  | C  | 1.134947  | 4.318734  | -0.414913 |
| 6  | H  | 0.017998  | 6.126326  | 0.014577  |
| 7  | H  | -1.984835 | 4.873308  | 0.785758  |
| 8  | H  | 2.013088  | 4.869005  | -0.770623 |
| 9  | N  | 0.007631  | 2.168070  | -0.002218 |
| 10 | C  | 2.377961  | 0.999003  | -1.508423 |
| 11 | C  | 3.558122  | 2.917395  | -1.049887 |
| 12 | C  | 3.622777  | 0.963535  | -2.229662 |
| 13 | C  | 4.340278  | 2.176555  | -1.889338 |
| 14 | H  | 3.764883  | 3.868212  | -0.576313 |
| 15 | C  | 3.882613  | -0.135765 | -3.052537 |
| 16 | C  | 1.735707  | -1.053279 | -2.344318 |
| 17 | H  | 5.330139  | 2.423141  | -2.249348 |
| 18 | C  | 2.907554  | -1.132068 | -3.122531 |
| 19 | H  | 4.814788  | -0.204831 | -3.622544 |
| 20 | H  | 0.975852  | -1.846525 | -2.387133 |
| 21 | H  | 3.051781  | -1.994017 | -3.782268 |
| 22 | C  | -2.369341 | 1.004042  | 1.500192  |
| 23 | C  | -3.544759 | 2.923035  | 1.033088  |
| 24 | C  | -3.619265 | 0.969033  | 2.212159  |
| 25 | C  | -4.334253 | 2.181530  | 1.865322  |
| 26 | H  | -3.747047 | 3.874462  | 0.558827  |
| 27 | C  | -3.883653 | -0.129170 | 3.035054  |
| 28 | C  | -1.732125 | -1.047533 | 2.343178  |
| 29 | H  | -5.327371 | 2.427438  | 2.216849  |
| 30 | C  | -2.908995 | -1.125332 | 3.113638  |
| 31 | H  | -4.819217 | -0.197872 | 3.599081  |
| 32 | H  | -0.972313 | -1.840494 | 2.391487  |
| 33 | H  | -3.057845 | -1.986051 | 3.773992  |
| 34 | N  | 1.458378  | -0.011969 | -1.501354 |
| 35 | N  | -1.450415 | -0.007612 | 1.500031  |
| 36 | N  | -2.301778 | 2.223619  | 0.754714  |
| 37 | N  | 2.316637  | 2.218790  | -0.762623 |
| 38 | Ru | 0.003662  | 0.000015  | -0.001376 |
| 39 | C  | -1.106054 | -2.910808 | -0.398619 |
| 40 | C  | 1.111950  | -2.911144 | 0.398418  |

|    |   |           |           |           |
|----|---|-----------|-----------|-----------|
| 41 | C | -1.117390 | -4.320816 | -0.424807 |
| 42 | C | 1.124104  | -4.321057 | 0.423870  |
| 43 | C | 0.003215  | -5.029087 | -0.000523 |
| 44 | H | -1.992164 | -4.872858 | -0.785660 |
| 45 | H | 1.999301  | -4.873116 | 0.784076  |
| 46 | H | 0.003167  | -6.127218 | -0.000651 |
| 47 | N | 0.002892  | -2.168887 | -0.000083 |
| 48 | C | -2.367185 | -1.002314 | -1.511673 |
| 49 | C | -3.542256 | -2.925859 | -1.059821 |
| 50 | C | -3.611369 | -0.969066 | -2.234136 |
| 51 | C | -4.325547 | -2.185424 | -1.898379 |
| 52 | H | -3.746325 | -3.879191 | -0.590083 |
| 53 | C | -3.872802 | 0.130413  | -3.056006 |
| 54 | C | -1.728772 | 1.052570  | -2.345324 |
| 55 | H | -5.313722 | -2.434486 | -2.261373 |
| 56 | C | -2.901052 | 1.130602  | -3.122435 |
| 57 | H | -4.802943 | 0.197646  | -3.629340 |
| 58 | H | -0.969583 | 1.846770  | -2.386916 |
| 59 | H | -3.048358 | 1.994246  | -3.779480 |
| 60 | C | 2.369482  | -1.002694 | 1.514272  |
| 61 | C | 3.547350  | -2.924791 | 1.065926  |
| 62 | C | 3.609994  | -0.968948 | 2.242652  |
| 63 | C | 4.327048  | -2.183588 | 1.907236  |
| 64 | H | 3.754018  | -3.877678 | 0.596512  |
| 65 | C | 3.866406  | 0.129369  | 3.067938  |
| 66 | C | 1.724821  | 1.049862  | 2.349531  |
| 67 | H | 5.314867  | -2.430964 | 2.272265  |
| 68 | C | 2.892341  | 1.127204  | 3.133846  |
| 69 | H | 4.793972  | 0.195670  | 3.645297  |
| 70 | H | 0.963974  | 1.842402  | 2.389415  |
| 71 | H | 3.034532  | 1.987928  | 3.795632  |
| 72 | N | -2.303952 | -2.223276 | -0.767809 |
| 73 | N | -1.449167 | 0.009957  | -1.504291 |
| 74 | N | 2.309373  | -2.223221 | 0.769328  |
| 75 | N | 1.451729  | 0.009595  | 1.503595  |

[Ru(DBPzP)<sub>2</sub>]<sup>2+</sup>

|   |   |           |           |           |
|---|---|-----------|-----------|-----------|
| 1 | C | -1.582329 | 2.996905  | 4.072647  |
| 2 | C | -2.990557 | 1.412228  | 5.260010  |
| 3 | H | -1.196229 | 4.014936  | 3.924004  |
| 4 | H | -3.717426 | 1.176421  | 6.049704  |
| 5 | C | -0.667801 | -3.547737 | -1.122760 |
| 6 | C | 1.175783  | -4.065370 | 0.392437  |
| 7 | H | -1.233109 | -3.733011 | -2.050545 |

|    |    |           |           |           |
|----|----|-----------|-----------|-----------|
| 8  | H  | 2.064049  | -4.660031 | 0.660504  |
| 9  | Ru | -1.019398 | -0.753162 | 2.225486  |
| 10 | C  | 0.736423  | -3.048572 | 1.242243  |
| 11 | C  | -1.077525 | -2.539171 | -0.247744 |
| 12 | C  | -2.540921 | 0.394164  | 4.418270  |
| 13 | C  | -1.142479 | 1.969239  | 3.238485  |
| 14 | C  | 0.465521  | -4.308926 | -0.794461 |
| 15 | H  | 0.800530  | -5.108088 | -1.475111 |
| 16 | C  | -2.509744 | 2.715676  | 5.084528  |
| 17 | H  | -2.858957 | 3.517852  | 5.740664  |
| 18 | N  | -1.606090 | 0.639684  | 3.384426  |
| 19 | N  | -0.379355 | -2.286632 | 0.924509  |
| 20 | C  | -2.715203 | -3.083817 | 3.530628  |
| 21 | C  | -3.632275 | -3.059699 | 4.646249  |
| 22 | C  | 0.936642  | 1.007828  | 0.468751  |
| 23 | C  | 1.246125  | 2.416924  | 0.541694  |
| 24 | C  | -4.002352 | -0.498663 | -0.864787 |
| 25 | C  | -3.515918 | 0.034508  | 0.391705  |
| 26 | C  | 2.369974  | -2.288814 | 4.381511  |
| 27 | C  | 1.291848  | -1.321345 | 4.353621  |
| 28 | N  | 0.576517  | -1.508959 | 3.158817  |
| 29 | N  | -0.004030 | 0.722404  | 1.495347  |
| 30 | N  | -2.223092 | -1.762761 | 3.353165  |
| 31 | N  | -2.358949 | -0.681328 | 0.743027  |
| 32 | N  | 0.511067  | 3.014592  | 1.601133  |
| 33 | N  | -3.717891 | -1.740913 | 5.167792  |
| 34 | N  | 2.327140  | -3.071639 | 3.220071  |
| 35 | N  | -3.160509 | -1.533700 | -1.292087 |
| 36 | C  | 1.278353  | -2.607493 | 2.522921  |
| 37 | C  | -2.212230 | -1.627410 | -0.346464 |
| 38 | C  | -2.904854 | -1.009013 | 4.415813  |
| 39 | C  | -0.199904 | 2.031270  | 2.138191  |
| 40 | C  | 1.101264  | -0.408734 | 5.406424  |
| 41 | C  | 1.989484  | -0.478796 | 6.468354  |
| 42 | H  | 1.882668  | 0.211007  | 7.313272  |
| 43 | C  | 3.050813  | -1.426337 | 6.505081  |
| 44 | H  | 3.715803  | -1.427320 | 7.376243  |
| 45 | C  | 3.257725  | -2.330565 | 5.482204  |
| 46 | H  | 4.071041  | -3.062209 | 5.500185  |
| 47 | H  | 0.290749  | 0.316554  | 5.382409  |
| 48 | C  | -4.181816 | 1.087322  | 1.044677  |
| 49 | C  | -5.320648 | 1.587451  | 0.433095  |
| 50 | H  | -5.874825 | 2.407923  | 0.903348  |
| 51 | C  | -5.806482 | 1.069244  | -0.800125 |
| 52 | H  | -6.713388 | 1.511680  | -1.227844 |

|    |   |           |           |           |
|----|---|-----------|-----------|-----------|
| 53 | C | -5.169195 | 0.036934  | -1.459220 |
| 54 | H | -5.533695 | -0.368950 | -2.407498 |
| 55 | H | -3.814410 | 1.486780  | 1.987515  |
| 56 | C | -4.279961 | -4.231966 | 5.059233  |
| 57 | C | -4.003293 | -5.401126 | 4.357514  |
| 58 | H | -4.491834 | -6.335872 | 4.653886  |
| 59 | C | -3.106382 | -5.418703 | 3.268004  |
| 60 | H | -2.926814 | -6.366434 | 2.752161  |
| 61 | C | -2.448896 | -4.266664 | 2.835292  |
| 62 | H | -1.764372 | -4.296543 | 1.997000  |
| 63 | C | 2.154056  | 2.992211  | -0.357385 |
| 64 | C | 2.734792  | 2.157964  | -1.308094 |
| 65 | H | 3.448708  | 2.575398  | -2.026620 |
| 66 | C | 2.429186  | 0.782276  | -1.374004 |
| 67 | H | 2.915494  | 0.173434  | -2.141496 |
| 68 | C | 1.529147  | 0.183360  | -0.491325 |
| 69 | H | 1.306588  | -0.874122 | -0.554844 |
| 70 | H | 2.388078  | 4.059611  | -0.301245 |
| 71 | H | -4.974689 | -4.211945 | 5.904584  |

Ru[BPy-2COOH)<sub>2</sub>(NCS)<sub>2</sub>

|    |   |           |           |           |
|----|---|-----------|-----------|-----------|
| 1  | C | -0.862075 | -2.963056 | 2.334633  |
| 2  | C | -2.247885 | -2.762335 | 2.546173  |
| 3  | C | -2.914856 | -1.765728 | 1.841538  |
| 4  | C | -2.194677 | -0.971572 | 0.922193  |
| 5  | C | -0.199744 | -2.164974 | 1.417033  |
| 6  | H | -0.339023 | -3.749037 | 2.888979  |
| 7  | H | 0.870742  | -2.291129 | 1.203841  |
| 8  | C | -3.602938 | 2.286500  | -1.381399 |
| 9  | C | -4.108290 | 0.546938  | 0.234688  |
| 10 | H | -3.939741 | 3.128104  | -1.997296 |
| 11 | H | -4.816359 | 0.018548  | 0.883511  |
| 12 | N | -0.834577 | -1.172829 | 0.688639  |
| 13 | C | 0.863317  | 2.965280  | 2.332853  |
| 14 | C | 2.248869  | 2.763948  | 2.544956  |
| 15 | C | 2.915588  | 1.766652  | 1.840926  |
| 16 | C | 2.195237  | 0.972708  | 0.921742  |
| 17 | C | 0.200683  | 2.166762  | 1.416007  |
| 18 | H | 0.340257  | 3.751602  | 2.886770  |
| 19 | H | -0.869901 | 2.292942  | 1.202937  |
| 20 | C | 3.603443  | -2.284554 | -1.382287 |
| 21 | C | 4.108560  | -0.545736 | 0.234568  |
| 22 | H | 3.940275  | -3.126119 | -1.998231 |
| 23 | H | 4.816426  | -0.017559 | 0.883782  |

|    |    |           |           |           |
|----|----|-----------|-----------|-----------|
| 24 | N  | 0.835133  | 1.173870  | 0.688191  |
| 25 | Ru | 0.000081  | 0.000713  | -0.738595 |
| 26 | C  | 2.762698  | -0.127235 | 0.155036  |
| 27 | C  | 2.296786  | -1.838833 | -1.431382 |
| 28 | C  | -2.762501 | 0.128302  | 0.155441  |
| 29 | C  | -2.296284 | 1.840779  | -1.430316 |
| 30 | C  | 4.527398  | -1.632431 | -0.524264 |
| 31 | C  | -4.527066 | 1.633526  | -0.524321 |
| 32 | N  | -1.838057 | 0.767603  | -0.676831 |
| 33 | N  | 1.838284  | -0.766308 | -0.677191 |
| 34 | H  | 1.545897  | -2.303050 | -2.093276 |
| 35 | H  | 3.988727  | 1.602174  | 1.994816  |
| 36 | C  | 5.932012  | -2.078785 | -0.426635 |
| 37 | O  | 6.819338  | -1.641220 | 0.269968  |
| 38 | O  | 6.178753  | -3.145267 | -1.261411 |
| 39 | H  | 7.127860  | -3.449425 | -1.213214 |
| 40 | C  | 3.013587  | 3.596490  | 3.501378  |
| 41 | O  | 4.175488  | 3.506762  | 3.822311  |
| 42 | O  | 2.219317  | 4.573608  | 4.057613  |
| 43 | H  | 2.724789  | 5.150289  | 4.697180  |
| 44 | H  | -3.988218 | -1.601865 | 1.994562  |
| 45 | H  | -1.545367 | 2.305195  | -2.092023 |
| 46 | C  | -3.013232 | -3.595689 | 3.501477  |
| 47 | O  | -4.175176 | -3.504972 | 3.822059  |
| 48 | O  | -2.220656 | -4.575217 | 4.055732  |
| 49 | H  | -2.727119 | -5.152901 | 4.693494  |
| 50 | C  | -5.932213 | 2.078453  | -0.428245 |
| 51 | O  | -6.819694 | 1.641365  | 0.268424  |
| 52 | O  | -6.179849 | 3.142472  | -1.266015 |
| 53 | H  | -7.129722 | 3.444814  | -1.219647 |
| 54 | N  | 0.700770  | 1.247760  | -2.175994 |
| 55 | C  | 1.106326  | 1.991580  | -2.999059 |
| 56 | S  | 1.644409  | 3.037891  | -4.090026 |
| 57 | N  | -0.700664 | -1.245671 | -2.176651 |
| 58 | C  | -1.105956 | -1.992972 | -2.996613 |
| 59 | S  | -1.643802 | -3.042496 | -4.084551 |

[Ru(TPy)<sub>2</sub>]<sup>2+</sup>

|   |   |          |           |           |
|---|---|----------|-----------|-----------|
| 1 | C | 2.663330 | 0.830354  | 0.851045  |
| 2 | C | 4.065762 | 0.838738  | 0.853982  |
| 3 | C | 4.753145 | -0.006099 | -0.027153 |
| 4 | C | 4.054935 | -0.849653 | -0.900629 |
| 5 | C | 2.652647 | -0.839185 | -0.882827 |
| 6 | H | 4.620153 | 1.493860  | 1.532659  |

|    |   |           |           |           |
|----|---|-----------|-----------|-----------|
| 7  | H | 5.850234  | -0.007076 | -0.033119 |
| 8  | H | 4.601029  | -1.505803 | -1.585244 |
| 9  | N | 1.970247  | -0.003813 | -0.012096 |
| 10 | C | 1.757567  | 1.640343  | 1.695379  |
| 11 | C | 2.201648  | 2.566930  | 2.653683  |
| 12 | C | -0.500190 | 2.135640  | 2.218800  |
| 13 | C | 1.263890  | 3.284515  | 3.401332  |
| 14 | H | 3.271806  | 2.727561  | 2.815411  |
| 15 | C | -0.102328 | 3.068523  | 3.183577  |
| 16 | H | -1.561054 | 1.930450  | 2.011059  |
| 17 | H | 1.596210  | 4.011538  | 4.153148  |
| 18 | H | -0.852165 | 3.621547  | 3.759824  |
| 19 | C | 1.736530  | -1.647463 | -1.717261 |
| 20 | C | 2.168642  | -2.573696 | -2.681433 |
| 21 | C | -0.527176 | -2.139681 | -2.215462 |
| 22 | C | 1.222048  | -3.289138 | -3.419693 |
| 23 | H | 3.236869  | -2.735719 | -2.855151 |
| 24 | C | -0.141432 | -3.071529 | -3.186215 |
| 25 | H | -1.585611 | -1.934322 | -1.995215 |
| 26 | H | 1.544845  | -4.015373 | -4.176168 |
| 27 | H | -0.898369 | -3.622573 | -3.755078 |
| 28 | N | 0.400005  | 1.423296  | 1.476531  |
| 29 | N | 0.381877  | -1.428740 | -1.482695 |
| 30 | C | -4.754096 | 0.005191  | 0.027158  |
| 31 | C | -4.057639 | -0.873427 | 0.866815  |
| 32 | C | -2.655166 | -0.865572 | 0.848825  |
| 33 | C | -2.662373 | 0.868427  | -0.820188 |
| 34 | C | -4.064639 | 0.881431  | -0.821241 |
| 35 | H | -5.851065 | 0.006860  | 0.033533  |
| 36 | H | -4.604844 | -1.554245 | 1.525940  |
| 37 | H | -4.617572 | 1.564251  | -1.473511 |
| 38 | N | -1.970918 | -0.000134 | 0.009999  |
| 39 | C | -1.740499 | -1.706113 | 1.652439  |
| 40 | C | -2.174573 | -2.667263 | 2.580715  |
| 41 | C | 0.522109  | -2.218294 | 2.134339  |
| 42 | C | -1.229431 | -3.411277 | 3.292365  |
| 43 | H | -3.243121 | -2.834331 | 2.747061  |
| 44 | C | 0.134409  | -3.185918 | 3.068786  |
| 45 | H | 1.580895  | -2.005004 | 1.923691  |
| 46 | H | -1.553610 | -4.165635 | 4.020121  |
| 47 | H | 0.890298  | -3.758663 | 3.616988  |
| 48 | C | -1.754541 | 1.706590  | -1.634230 |
| 49 | C | -2.196478 | 2.668618  | -2.557804 |
| 50 | C | 0.504018  | 2.215093  | -2.139391 |
| 51 | C | -1.257432 | 3.410980  | -3.279001 |



|    |    |           |           |           |
|----|----|-----------|-----------|-----------|
| 52 | H  | -3.266469 | 2.837462  | -2.713418 |
| 53 | C  | 0.108314  | 3.183932  | -3.069098 |
| 54 | H  | 1.564543  | 2.000066  | -1.939497 |
| 55 | H  | -1.587949 | 4.165448  | -4.003653 |
| 56 | H  | 0.859409  | 3.756295  | -3.624643 |
| 57 | N  | -0.385455 | -1.480395 | 1.426960  |
| 58 | N  | -0.397554 | 1.477719  | -1.423874 |
| 59 | Ru | -0.000242 | -0.002177 | -0.001049 |

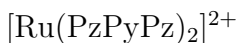

|    |    |           |           |           |
|----|----|-----------|-----------|-----------|
| 1  | C  | -1.518291 | 2.866626  | 3.994998  |
| 2  | C  | -2.977218 | 1.277594  | 5.161149  |
| 3  | H  | -1.125023 | 3.882602  | 3.886487  |
| 4  | H  | -3.706943 | 1.070227  | 5.950505  |
| 5  | C  | -0.689479 | -3.625730 | -1.205720 |
| 6  | C  | 1.131529  | -4.169817 | 0.343816  |
| 7  | H  | -1.221859 | -3.821254 | -2.142166 |
| 8  | H  | 1.999146  | -4.785778 | 0.602080  |
| 9  | Ru | -1.011660 | -0.906413 | 2.066561  |
| 10 | C  | 0.687770  | -3.137662 | 1.181092  |
| 11 | C  | -1.091682 | -2.608534 | -0.330113 |
| 12 | C  | -2.535484 | 0.275402  | 4.287231  |
| 13 | C  | -1.111067 | 1.826586  | 3.149133  |
| 14 | C  | 0.427414  | -4.397337 | -0.848797 |
| 15 | H  | 0.759408  | -5.202291 | -1.522055 |
| 16 | C  | -2.455451 | 2.570261  | 4.997065  |
| 17 | H  | -2.789438 | 3.372696  | 5.672496  |
| 18 | N  | -1.614747 | 0.547350  | 3.292755  |
| 19 | N  | -0.409475 | -2.365849 | 0.847399  |
| 20 | N  | -2.922561 | -1.105858 | 4.261931  |
| 21 | C  | -3.823001 | -1.823629 | 5.084196  |
| 22 | C  | -2.909287 | -3.178445 | 3.511642  |
| 23 | C  | -3.821586 | -3.127786 | 4.620454  |
| 24 | H  | -4.367101 | -1.362574 | 5.897695  |
| 25 | H  | -2.661704 | -4.043853 | 2.907366  |
| 26 | H  | -4.391043 | -3.963253 | 5.005334  |
| 27 | N  | -0.172306 | 1.886468  | 2.065628  |
| 28 | C  | 0.586757  | 2.970504  | 1.565047  |
| 29 | C  | 1.004132  | 1.079541  | 0.385113  |
| 30 | C  | 1.329685  | 2.473465  | 0.508285  |
| 31 | H  | 0.535000  | 3.965123  | 1.987437  |
| 32 | H  | 1.400645  | 0.376340  | -0.338600 |
| 33 | H  | 2.027033  | 3.014337  | -0.117329 |
| 34 | N  | -2.194759 | -1.703028 | -0.477859 |

|    |   |           |           |           |
|----|---|-----------|-----------|-----------|
| 35 | C | -3.160794 | -1.590887 | -1.505457 |
| 36 | C | -3.998323 | -0.549794 | -1.143782 |
| 37 | H | -3.169147 | -2.236287 | -2.373490 |
| 38 | C | -3.519885 | -0.043387 | 0.112734  |
| 39 | H | -4.854017 | -0.174251 | -1.688886 |
| 40 | H | -3.936295 | 0.775419  | 0.688968  |
| 41 | N | 1.241883  | -2.722960 | 2.437964  |
| 42 | C | 2.352104  | -3.217718 | 3.162526  |
| 43 | C | 2.450402  | -2.442413 | 4.304876  |
| 44 | H | 2.953252  | -4.047896 | 2.816888  |
| 45 | C | 1.386301  | -1.478582 | 4.251565  |
| 46 | H | 3.180714  | -2.529889 | 5.098314  |
| 47 | H | 1.162672  | -0.710016 | 4.982753  |
| 48 | N | 0.653347  | -1.646854 | 3.121969  |
| 49 | N | 0.094600  | 0.722191  | 1.326495  |
| 50 | N | -2.363150 | -1.955488 | 3.293378  |
| 51 | N | -2.429553 | -0.741748 | 0.519118  |

[Ru(DQP)<sub>2</sub>]<sup>2+</sup>

|    |   |           |           |           |
|----|---|-----------|-----------|-----------|
| 1  | C | -1.149112 | -2.794727 | 0.292082  |
| 2  | C | -1.147114 | -4.205739 | 0.341862  |
| 3  | C | 0.001422  | -4.916423 | 0.001868  |
| 4  | C | 1.149364  | -4.205171 | -0.339121 |
| 5  | C | 1.151117  | -2.794121 | -0.289092 |
| 6  | N | 0.000792  | -2.085671 | 0.001636  |
| 7  | H | -2.044680 | -4.752402 | 0.650574  |
| 8  | H | 0.001812  | -6.012539 | 0.002345  |
| 9  | C | -3.612251 | -2.769426 | 0.245377  |
| 10 | C | 3.614338  | -2.766523 | -0.244100 |
| 11 | H | 2.046370  | -4.751410 | -0.649892 |
| 12 | C | 4.874943  | -2.373039 | -0.768988 |
| 13 | C | -4.873810 | -2.376577 | 0.768214  |
| 14 | C | 4.955424  | -1.358832 | -1.689903 |
| 15 | H | 5.769244  | -2.924789 | -0.460642 |
| 16 | C | 2.439575  | -2.116429 | -0.595186 |
| 17 | C | -4.956369 | -1.360449 | 1.686845  |
| 18 | H | -5.767307 | -2.929794 | 0.459840  |
| 19 | C | -2.438416 | -2.117707 | 0.596896  |
| 20 | C | 3.786363  | -0.609575 | -2.025378 |
| 21 | H | 5.905061  | -1.106099 | -2.172001 |
| 22 | C | 2.550347  | -0.911213 | -1.379690 |
| 23 | C | -2.551000 | -0.911669 | 1.379805  |
| 24 | C | -3.788288 | -0.609717 | 2.022750  |
| 25 | H | -5.907020 | -1.107461 | 2.166799  |

|    |   |           |           |           |
|----|---|-----------|-----------|-----------|
| 26 | N | 1.460299  | -0.036760 | -1.505187 |
| 27 | C | 3.820774  | 0.449865  | -2.986891 |
| 28 | N | -1.461536 | -0.036513 | 1.506605  |
| 29 | C | -3.825305 | 0.451518  | 2.982047  |
| 30 | C | 2.688428  | 1.190790  | -3.215310 |
| 31 | H | 4.750085  | 0.645782  | -3.531868 |
| 32 | C | 1.531798  | 0.948858  | -2.418984 |
| 33 | C | -1.535248 | 0.950371  | 2.418868  |
| 34 | C | -2.693906 | 1.193533  | 3.211777  |
| 35 | H | -4.756215 | 0.648165  | 3.524200  |
| 36 | H | 2.659794  | 1.976865  | -3.974695 |
| 37 | H | 0.645046  | 1.595993  | -2.524122 |
| 38 | H | -0.648803 | 1.597758  | 2.525144  |
| 39 | H | -2.667211 | 1.981391  | 3.969701  |
| 40 | C | 1.150526  | 2.794370  | 0.290898  |
| 41 | C | 3.613637  | 2.767602  | 0.245759  |
| 42 | C | 2.439196  | 2.116766  | 0.597130  |
| 43 | C | 2.550553  | 0.911363  | 1.381091  |
| 44 | N | 1.460809  | 0.036437  | 1.507089  |
| 45 | C | 1.533731  | -0.950725 | 2.419007  |
| 46 | H | 0.647414  | -1.598319 | 2.524230  |
| 47 | C | 2.691557  | -1.193816 | 3.213509  |
| 48 | H | 2.664502  | -1.982148 | 3.970700  |
| 49 | C | 3.822896  | -0.451197 | 2.985515  |
| 50 | H | 4.752752  | -0.647109 | 3.529875  |
| 51 | C | 3.787023  | 0.609662  | 2.025928  |
| 52 | C | 4.955301  | 1.360816  | 1.691432  |
| 53 | H | 5.904924  | 1.109165  | 2.174023  |
| 54 | C | 4.874151  | 2.375497  | 0.771044  |
| 55 | H | 5.768486  | 2.928076  | 0.463358  |
| 56 | N | 0.000168  | 2.086090  | 0.000959  |
| 57 | C | -1.149468 | 2.795161  | -0.290356 |
| 58 | C | -3.612725 | 2.769793  | -0.244722 |
| 59 | C | -2.438648 | 2.118394  | -0.595829 |
| 60 | C | -2.550295 | 0.912732  | -1.379349 |
| 61 | N | -1.460984 | 0.037153  | -1.504890 |
| 62 | C | -1.533990 | -0.949760 | -2.417044 |
| 63 | H | -0.648097 | -1.598023 | -2.521842 |
| 64 | C | -2.691587 | -1.192047 | -3.211967 |
| 65 | C | -3.822987 | -0.449592 | -2.983660 |
| 66 | H | -4.753128 | -0.645596 | -3.527350 |
| 67 | C | -3.786810 | 0.611363  | -2.023974 |
| 68 | C | -4.955252 | 1.361645  | -1.688595 |
| 69 | H | -5.905388 | 1.108959  | -2.169606 |
| 70 | C | -4.873643 | 2.377018  | -0.768930 |

|    |    |           |           |           |
|----|----|-----------|-----------|-----------|
| 71 | H  | -5.767718 | 2.929687  | -0.461117 |
| 72 | C  | -1.146982 | 4.206129  | -0.340985 |
| 73 | H  | -2.043919 | 4.752845  | -0.651269 |
| 74 | C  | 0.001569  | 4.916859  | -0.000622 |
| 75 | H  | 0.001946  | 6.012954  | -0.000728 |
| 76 | C  | 1.149476  | 4.205497  | 0.339957  |
| 77 | H  | 2.047317  | 4.751504  | 0.649216  |
| 78 | Ru | -0.000049 | 0.000172  | 0.001253  |
| 79 | H  | -2.663751 | -1.979724 | -3.969796 |
| 80 | H  | 3.594914  | -3.634741 | 0.424119  |
| 81 | H  | -3.591325 | -3.638227 | -0.421998 |
| 82 | H  | 3.593580  | 3.635162  | -0.423554 |
| 83 | H  | -3.592329 | 3.638181  | 0.423288  |

[Ru(DCpP)<sub>2</sub>]<sup>2+</sup>

|    |   |           |           |           |
|----|---|-----------|-----------|-----------|
| 1  | C | 2.510960  | -0.834267 | -3.504241 |
| 2  | C | 3.543534  | 0.103524  | -3.429302 |
| 3  | C | 3.528403  | 1.044053  | -2.392644 |
| 4  | C | 2.477901  | 1.017145  | -1.461417 |
| 5  | C | 1.501542  | -0.823642 | -2.528363 |
| 6  | H | 2.490709  | -1.580186 | -4.307725 |
| 7  | H | 4.357219  | 0.101548  | -4.166275 |
| 8  | H | 0.681539  | -1.558004 | -2.552152 |
| 9  | C | -3.522917 | 1.049231  | 2.402446  |
| 10 | C | -2.476938 | 1.017981  | 1.466095  |
| 11 | H | -4.346209 | 0.111589  | 4.181045  |
| 12 | C | -3.536371 | 0.109328  | 3.439720  |
| 13 | C | -1.502892 | -0.826281 | 2.528314  |
| 14 | C | -2.507658 | -0.833119 | 3.509082  |
| 15 | H | -0.686289 | -1.564426 | 2.547765  |
| 16 | H | -2.486720 | -1.579743 | 4.311953  |
| 17 | C | -1.192519 | 4.214812  | 0.161724  |
| 18 | C | 1.192922  | 4.214083  | -0.155350 |
| 19 | H | -2.150710 | 4.742002  | 0.269539  |
| 20 | H | 2.151702  | 4.740332  | -0.262710 |
| 21 | N | 1.474887  | 0.079466  | -1.500243 |
| 22 | N | -1.477187 | 0.076813  | 1.500268  |
| 23 | C | -2.508726 | 0.835539  | -3.507239 |
| 24 | C | -3.540084 | -0.103786 | -3.435529 |
| 25 | C | -3.525862 | -1.045598 | -2.399955 |
| 26 | C | -2.477565 | -1.017938 | -1.466015 |
| 27 | C | -1.501770 | 0.825553  | -2.528720 |
| 28 | H | -2.487518 | 1.582076  | -4.310169 |
| 29 | H | -4.352300 | -0.102409 | -4.174151 |

|    |    |           |           |           |
|----|----|-----------|-----------|-----------|
| 30 | H  | -0.683037 | 1.561658  | -2.549256 |
| 31 | C  | 3.527591  | -1.041620 | 2.394299  |
| 32 | C  | 2.477557  | -1.015688 | 1.462413  |
| 33 | H  | 4.354420  | -0.098591 | 4.168660  |
| 34 | C  | 3.541171  | -0.101210 | 3.431194  |
| 35 | C  | 1.498673  | 0.823747  | 2.528696  |
| 36 | C  | 2.507291  | 0.835280  | 3.505497  |
| 37 | H  | 0.678241  | 1.557563  | 2.551306  |
| 38 | H  | 2.485455  | 1.581103  | 4.309140  |
| 39 | C  | 1.194045  | -4.213860 | 0.155666  |
| 40 | C  | -1.190659 | -4.215707 | -0.164561 |
| 41 | H  | 2.152724  | -4.739826 | 0.264974  |
| 42 | H  | -2.148654 | -4.743006 | -0.273603 |
| 43 | N  | -1.475980 | -0.078693 | -1.501733 |
| 44 | N  | 1.473552  | -0.079037 | 1.500528  |
| 45 | Ru | -0.001404 | -0.000459 | -0.000485 |
| 46 | C  | -1.154438 | -2.809311 | -0.177136 |
| 47 | C  | 1.155381  | -2.807545 | 0.171932  |
| 48 | C  | 1.154371  | 2.807765  | -0.171197 |
| 49 | C  | -1.155718 | 2.808601  | 0.175101  |
| 50 | C  | 0.002411  | -4.925489 | -0.006164 |
| 51 | H  | 0.003610  | -6.024101 | -0.008784 |
| 52 | C  | 0.000772  | 4.925158  | 0.003784  |
| 53 | H  | 0.000625  | 6.023785  | 0.005049  |
| 54 | N  | -0.000963 | 2.090978  | 0.001074  |
| 55 | N  | -0.000089 | -2.091291 | -0.002056 |
| 56 | H  | 4.331900  | 1.786757  | -2.298093 |
| 57 | H  | -4.324308 | 1.793852  | 2.311065  |
| 58 | H  | -4.328229 | -1.789395 | -2.308248 |
| 59 | H  | 4.331798  | -1.783509 | 2.300249  |
| 60 | C  | -2.456709 | -2.060335 | -0.376106 |
| 61 | O  | -3.439185 | -2.347055 | 0.255178  |
| 62 | C  | -2.456821 | 2.057602  | 0.373524  |
| 63 | O  | -3.439035 | 2.339784  | -0.260310 |
| 64 | C  | 2.456228  | 2.058224  | -0.370351 |
| 65 | O  | 3.438199  | 2.343763  | 0.262521  |
| 66 | C  | 2.456636  | -2.056870 | 0.371656  |
| 67 | O  | 3.438709  | -2.341154 | -0.261565 |

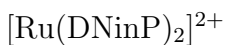

|   |   |           |           |           |
|---|---|-----------|-----------|-----------|
| 1 | C | -4.877735 | -2.355007 | -0.791905 |
| 2 | C | -3.620792 | -2.768598 | -0.269726 |
| 3 | C | -2.436241 | -2.122187 | -0.596753 |
| 4 | C | -3.771584 | -0.585743 | -2.007120 |

|    |    |           |           |           |
|----|----|-----------|-----------|-----------|
| 5  | C  | -4.956833 | -1.320250 | -1.689417 |
| 6  | H  | -5.778257 | -2.908132 | -0.494922 |
| 7  | H  | -3.616079 | -3.651174 | 0.381438  |
| 8  | H  | -5.898975 | -1.035146 | -2.177827 |
| 9  | C  | -1.150956 | -2.804935 | -0.287431 |
| 10 | C  | -1.150883 | -4.215465 | -0.334378 |
| 11 | C  | -0.000916 | -4.927037 | 0.000315  |
| 12 | H  | -2.051043 | -4.762806 | -0.638130 |
| 13 | C  | 1.150857  | -2.805280 | 0.288228  |
| 14 | C  | 1.149157  | -4.215950 | 0.335617  |
| 15 | H  | -0.001247 | -6.024445 | 0.000306  |
| 16 | H  | 2.048472  | -4.764142 | 0.640448  |
| 17 | N  | 0.000157  | -2.095530 | 0.000162  |
| 18 | C  | -2.531871 | -0.908501 | -1.362958 |
| 19 | C  | -1.551263 | 0.952825  | -2.405133 |
| 20 | C  | -2.755460 | 1.150281  | -3.174534 |
| 21 | H  | -0.695391 | 1.631520  | -2.536053 |
| 22 | H  | -2.793649 | 1.925872  | -3.958564 |
| 23 | N  | -1.450152 | -0.022275 | -1.486784 |
| 24 | C  | 2.436651  | -2.123324 | 0.597651  |
| 25 | C  | 3.620756  | -2.771183 | 0.272346  |
| 26 | C  | 3.772085  | -0.585268 | 2.006225  |
| 27 | C  | 4.877793  | -2.357179 | 0.794202  |
| 28 | H  | 3.615847  | -3.654878 | -0.377236 |
| 29 | C  | 4.957041  | -1.320695 | 1.689704  |
| 30 | H  | 5.778269  | -2.910758 | 0.498099  |
| 31 | H  | 5.899212  | -1.034528 | 2.177550  |
| 32 | C  | 2.532469  | -0.908473 | 1.362115  |
| 33 | C  | 1.551704  | 0.953947  | 2.402291  |
| 34 | C  | 2.756176  | 1.152871  | 3.170913  |
| 35 | H  | 0.694883  | 1.631531  | 2.533364  |
| 36 | H  | 2.794346  | 1.930013  | 3.953384  |
| 37 | N  | 1.450806  | -0.022188 | 1.485027  |
| 38 | Ru | 0.000094  | 0.000339  | -0.000617 |
| 39 | H  | -2.788950 | -1.923312 | 3.959610  |
| 40 | C  | -2.752212 | -1.148157 | 3.175121  |
| 41 | C  | -1.548855 | -0.950016 | 2.404776  |
| 42 | H  | -0.691522 | -1.626787 | 2.536237  |
| 43 | C  | -3.770929 | 0.586439  | 2.007898  |
| 44 | N  | -1.449952 | 0.023839  | 1.484826  |
| 45 | C  | -2.532160 | 0.909340  | 1.361887  |
| 46 | C  | -2.437205 | 2.122947  | 0.595512  |
| 47 | C  | -4.956694 | 1.320508  | 1.690842  |
| 48 | C  | -3.622250 | 2.768583  | 0.269061  |
| 49 | C  | -4.878719 | 2.354335  | 0.792150  |

|    |   |           |           |           |
|----|---|-----------|-----------|-----------|
| 50 | H | -5.898336 | 1.035431  | 2.180198  |
| 51 | H | -3.618448 | 3.650789  | -0.382574 |
| 52 | H | -5.780145 | 2.905684  | 0.494550  |
| 53 | C | -1.151384 | 2.805313  | 0.286282  |
| 54 | C | -1.150331 | 4.215860  | 0.334028  |
| 55 | C | 1.151063  | 2.805508  | -0.287419 |
| 56 | C | 0.000449  | 4.927283  | 0.001720  |
| 57 | H | -2.050744 | 4.763286  | 0.637014  |
| 58 | C | 1.150826  | 4.216156  | -0.332416 |
| 59 | H | 0.000688  | 6.024699  | 0.003023  |
| 60 | H | 2.051215  | 4.764091  | -0.634587 |
| 61 | N | -0.000180 | 2.095803  | -0.001048 |
| 62 | C | 2.436609  | 2.123232  | -0.597648 |
| 63 | C | 2.532285  | 0.908620  | -1.362364 |
| 64 | C | 3.621404  | 2.770171  | -0.272378 |
| 65 | C | 4.878063  | 2.356233  | -0.794974 |
| 66 | H | 3.617202  | 3.653449  | 0.377821  |
| 67 | C | 4.956846  | 1.320174  | -1.690947 |
| 68 | H | 5.778804  | 2.909912  | -0.499297 |
| 69 | H | 5.898673  | 1.034434  | -2.179761 |
| 70 | C | 3.771611  | 0.584884  | -2.006659 |
| 71 | C | 2.755328  | -1.153069 | -3.171336 |
| 72 | C | 1.550713  | -0.953057 | -2.403519 |
| 73 | H | 2.793804  | -1.930437 | -3.953510 |
| 74 | H | 0.693626  | -1.630117 | -2.534879 |
| 75 | N | 1.450409  | 0.022594  | -1.485552 |
| 76 | N | 3.852316  | 0.447283  | 2.934455  |
| 77 | N | -3.851768 | 0.445489  | -2.936823 |
| 78 | N | 3.851974  | -0.448386 | -2.934010 |
| 79 | N | -3.849447 | -0.444544 | 2.937953  |

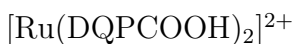

|    |   |           |           |          |
|----|---|-----------|-----------|----------|
| 1  | C | -2.708204 | -1.192110 | 3.194249 |
| 2  | C | -3.841615 | -0.457707 | 2.948127 |
| 3  | C | -3.798957 | 0.601970  | 1.987303 |
| 4  | C | -2.555065 | 0.908216  | 1.359726 |
| 5  | C | -1.541609 | -0.945800 | 2.414289 |
| 6  | H | -5.921334 | 1.094359  | 2.102629 |
| 7  | H | -2.686725 | -1.976469 | 3.956292 |
| 8  | H | -4.777798 | -0.658657 | 3.480272 |
| 9  | C | -4.964274 | 1.350264  | 1.636374 |
| 10 | C | -2.434900 | 2.114027  | 0.578471 |
| 11 | H | -0.652734 | -1.587199 | 2.533977 |
| 12 | C | -3.604470 | 2.767873  | 0.216638 |

|    |   |           |           |           |
|----|---|-----------|-----------|-----------|
| 13 | C | -4.871460 | 2.370130  | 0.722519  |
| 14 | H | -3.577236 | 3.641673  | -0.445104 |
| 15 | H | -5.762125 | 2.924342  | 0.405889  |
| 16 | C | 4.886656  | 2.361878  | -0.770998 |
| 17 | C | 4.965443  | 1.347481  | -1.691917 |
| 18 | C | 3.794985  | 0.600616  | -2.028096 |
| 19 | C | 2.558698  | 0.905177  | -1.384461 |
| 20 | C | 2.450909  | 2.108157  | -0.596606 |
| 21 | C | 3.627051  | 2.756652  | -0.245238 |
| 22 | H | 4.758103  | -0.658160 | -3.532649 |
| 23 | H | 5.782301  | 2.912659  | -0.462837 |
| 24 | H | 5.915102  | 1.093420  | -2.174103 |
| 25 | C | 3.827829  | -0.458470 | -2.989681 |
| 26 | H | 3.610228  | 3.624898  | 0.424020  |
| 27 | C | 1.535173  | -0.948831 | -2.429316 |
| 28 | C | 2.693149  | -1.194996 | -3.221853 |
| 29 | H | 0.645591  | -1.591249 | -2.539095 |
| 30 | H | 2.664040  | -1.980698 | -3.982270 |
| 31 | C | 1.170577  | 4.195163  | -0.320666 |
| 32 | C | -1.135660 | 4.195202  | 0.356866  |
| 33 | H | 2.070865  | 4.753323  | -0.619508 |
| 34 | H | -2.032376 | 4.753588  | 0.667225  |
| 35 | N | -1.462838 | 0.038818  | 1.499879  |
| 36 | N | 1.464716  | 0.036328  | -1.514555 |
| 37 | C | 2.712065  | 1.196792  | 3.188319  |
| 38 | C | 3.845052  | 0.461832  | 2.942034  |
| 39 | C | 3.801045  | -0.600447 | 1.984266  |
| 40 | C | 2.556378  | -0.908025 | 1.358945  |
| 41 | C | 1.543989  | 0.947940  | 2.411465  |
| 42 | H | 5.923263  | -1.093640 | 2.099129  |
| 43 | H | 2.691581  | 1.982915  | 3.948586  |
| 44 | H | 4.782056  | 0.664286  | 3.472324  |
| 45 | C | 4.965587  | -1.350559 | 1.634745  |
| 46 | C | 2.435025  | -2.115521 | 0.580486  |
| 47 | H | 0.654529  | 1.588500  | 2.531876  |
| 48 | C | 3.603848  | -2.771664 | 0.220347  |
| 49 | C | 4.871352  | -2.373616 | 0.724745  |
| 50 | H | 3.575785  | -3.647432 | -0.438671 |
| 51 | H | 5.761220  | -2.930047 | 0.409699  |
| 52 | C | -4.886303 | -2.360219 | -0.770496 |
| 53 | C | -4.964572 | -1.346769 | -1.692512 |
| 54 | C | -3.793755 | -0.600415 | -2.028953 |
| 55 | C | -2.557810 | -0.904715 | -1.384509 |
| 56 | C | -2.450629 | -2.107296 | -0.596074 |
| 57 | C | -3.626977 | -2.754987 | -0.244252 |



|    |    |           |           |           |
|----|----|-----------|-----------|-----------|
| 58 | H  | -4.755973 | 0.656961  | -3.535362 |
| 59 | H  | -5.782221 | -2.910339 | -0.462092 |
| 60 | H  | -5.914061 | -1.092928 | -2.175056 |
| 61 | C  | -3.826115 | 0.457737  | -2.991552 |
| 62 | H  | -3.610513 | -3.623001 | 0.425212  |
| 63 | C  | -1.533649 | 0.948494  | -2.430268 |
| 64 | C  | -2.691284 | 1.194146  | -3.223503 |
| 65 | H  | -0.644118 | 1.590889  | -2.540161 |
| 66 | H  | -2.661790 | 1.979158  | -3.984682 |
| 67 | C  | -1.171470 | -4.194682 | -0.319888 |
| 68 | C  | 1.134439  | -4.196078 | 0.359248  |
| 69 | H  | -2.071543 | -4.752347 | -0.620103 |
| 70 | H  | 2.030445  | -4.754985 | 0.670475  |
| 71 | N  | 1.464124  | -0.038630 | 1.499234  |
| 72 | N  | -1.463489 | -0.036294 | -1.515075 |
| 73 | Ru | 0.000353  | -0.000124 | -0.007738 |
| 74 | C  | 1.140136  | -2.786532 | 0.290698  |
| 75 | C  | -1.163150 | -2.782574 | -0.284853 |
| 76 | C  | -1.140397 | 2.785803  | 0.288528  |
| 77 | C  | 1.163031  | 2.782888  | -0.285779 |
| 78 | C  | -0.023080 | -4.902241 | 0.029469  |
| 79 | C  | 0.021842  | 4.902074  | 0.027818  |
| 80 | N  | 0.008940  | 2.074779  | -0.005479 |
| 81 | N  | -0.008788 | -2.075050 | -0.004311 |
| 82 | C  | 0.012737  | -6.398493 | 0.058328  |
| 83 | O  | 0.969784  | -7.101098 | 0.258102  |
| 84 | O  | -1.232631 | -6.909198 | -0.179457 |
| 85 | H  | -1.244197 | -7.917083 | -0.171419 |
| 86 | C  | -0.016188 | 6.398334  | 0.057158  |
| 87 | O  | -0.974691 | 7.098338  | 0.259139  |
| 88 | O  | 1.227534  | 6.911485  | -0.183164 |
| 89 | H  | 1.237141  | 7.919465  | -0.175004 |

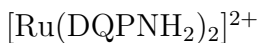

|    |   |           |           |          |
|----|---|-----------|-----------|----------|
| 1  | C | -2.691547 | -1.186999 | 3.205852 |
| 2  | C | -3.823535 | -0.447556 | 2.973131 |
| 3  | C | -3.787283 | 0.610914  | 2.010758 |
| 4  | C | -2.549027 | 0.916713  | 1.371313 |
| 5  | C | -1.533480 | -0.945906 | 2.410440 |
| 6  | H | -5.909855 | 1.093797  | 2.141361 |
| 7  | H | -2.663682 | -1.972444 | 3.965102 |
| 8  | H | -4.754120 | -0.643423 | 3.514774 |
| 9  | C | -4.958531 | 1.352970  | 1.666860 |
| 10 | C | -2.439177 | 2.124730  | 0.591343 |

|    |   |           |           |           |
|----|---|-----------|-----------|-----------|
| 11 | H | -0.648737 | -1.596941 | 2.511185  |
| 12 | C | -3.615045 | 2.768018  | 0.231921  |
| 13 | C | -4.877715 | 2.366883  | 0.745892  |
| 14 | H | -3.592996 | 3.636369  | -0.435962 |
| 15 | H | -5.772591 | 2.911152  | 0.428644  |
| 16 | C | 4.876197  | 2.371562  | -0.747580 |
| 17 | C | 4.959825  | 1.353866  | -1.664060 |
| 18 | C | 3.789618  | 0.610079  | -2.007978 |
| 19 | C | 2.549668  | 0.917480  | -1.372476 |
| 20 | C | 2.437430  | 2.127171  | -0.595175 |
| 21 | C | 3.612445  | 2.772528  | -0.236222 |
| 22 | H | 4.761485  | -0.650079 | -3.503960 |
| 23 | H | 5.770068  | 2.918704  | -0.431796 |
| 24 | H | 5.912306  | 1.093127  | -2.135074 |
| 25 | C | 3.829029  | -0.451982 | -2.966277 |
| 26 | H | 3.589036  | 3.642441  | 0.429629  |
| 27 | C | 1.536964  | -0.947777 | -2.410048 |
| 28 | C | 2.697727  | -1.192077 | -3.200467 |
| 29 | H | 0.651961  | -1.598044 | -2.512688 |
| 30 | H | 2.672387  | -1.979860 | -3.957319 |
| 31 | C | 1.158990  | 4.214321  | -0.349668 |
| 32 | C | -1.162883 | 4.212914  | 0.346614  |
| 33 | H | 2.054155  | 4.751105  | -0.667853 |
| 34 | H | -2.058358 | 4.748585  | 0.665773  |
| 35 | N | -1.459914 | 0.040251  | 1.498143  |
| 36 | N | 1.461108  | 0.040523  | -1.500191 |
| 37 | C | 2.695203  | 1.192594  | 3.199121  |
| 38 | C | 3.826994  | 0.452528  | 2.966426  |
| 39 | C | 3.788995  | -0.609109 | 2.007743  |
| 40 | C | 2.549967  | -0.916608 | 1.370602  |
| 41 | C | 1.535317  | 0.947865  | 2.407544  |
| 42 | H | 5.911574  | -1.092207 | 2.137741  |
| 43 | H | 2.668434  | 1.980393  | 3.955959  |
| 44 | H | 4.758500  | 0.650477  | 3.505891  |
| 45 | C | 4.959656  | -1.352886 | 1.665426  |
| 46 | C | 2.439097  | -2.126527 | 0.593558  |
| 47 | H | 0.649878  | 1.597625  | 2.509522  |
| 48 | C | 3.614395  | -2.771980 | 0.236067  |
| 49 | C | 4.877485  | -2.370402 | 0.748685  |
| 50 | H | 3.591756  | -3.642292 | -0.429143 |
| 51 | H | 5.771766  | -2.916956 | 0.433399  |
| 52 | C | -4.875651 | -2.370303 | -0.746254 |
| 53 | C | -4.959207 | -1.353755 | -1.664029 |
| 54 | C | -3.789057 | -0.610261 | -2.008905 |
| 55 | C | -2.549261 | -0.917139 | -1.372962 |

|    |    |           |           |           |
|----|----|-----------|-----------|-----------|
| 56 | C  | -2.436983 | -2.126621 | -0.595504 |
| 57 | C  | -3.611759 | -2.771837 | -0.235671 |
| 58 | H  | -4.759562 | 0.647562  | -3.507701 |
| 59 | H  | -5.769625 | -2.916289 | -0.429049 |
| 60 | H  | -5.911947 | -1.093553 | -2.135009 |
| 61 | C  | -3.827676 | 0.450444  | -2.968698 |
| 62 | H  | -3.588107 | -3.642026 | 0.429771  |
| 63 | C  | -1.535985 | 0.947407  | -2.411485 |
| 64 | C  | -2.696284 | 1.190432  | -3.203016 |
| 65 | H  | -0.651046 | 1.597724  | -2.513901 |
| 66 | H  | -2.670171 | 1.977009  | -3.961132 |
| 67 | C  | -1.159095 | -4.213893 | -0.352538 |
| 68 | C  | 1.160785  | -4.214043 | 0.349238  |
| 69 | H  | -2.053516 | -4.749618 | -0.674304 |
| 70 | H  | 2.055088  | -4.750441 | 0.670486  |
| 71 | N  | 1.460668  | -0.040319 | 1.497512  |
| 72 | N  | -1.460511 | -0.040445 | -1.501104 |
| 73 | Ru | 0.000019  | -0.000135 | -0.001757 |
| 74 | C  | 1.152072  | -2.817398 | 0.293324  |
| 75 | C  | -1.149559 | -2.817300 | -0.296733 |
| 76 | C  | -1.152631 | 2.816377  | 0.291350  |
| 77 | C  | 1.149817  | 2.817632  | -0.295801 |
| 78 | C  | 0.000418  | -4.951623 | -0.000624 |
| 79 | C  | -0.002462 | 4.951032  | -0.001745 |
| 80 | N  | -0.001107 | 2.104615  | -0.002543 |
| 81 | N  | 0.001183  | -2.104862 | -0.001404 |
| 82 | N  | 0.000221  | -6.322273 | 0.000582  |
| 83 | N  | -0.004015 | 6.321644  | -0.003196 |
| 84 | H  | 0.819223  | -6.853839 | 0.253923  |
| 85 | H  | 0.815449  | 6.853103  | -0.254877 |
| 86 | H  | -0.822403 | 6.852432  | 0.253413  |
| 87 | H  | -0.819318 | -6.853165 | -0.251883 |

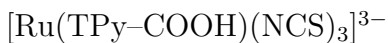

|    |   |           |          |           |
|----|---|-----------|----------|-----------|
| 1  | C | 1.234402  | 1.636459 | 0.001409  |
| 2  | C | 1.271141  | 3.021394 | -0.040836 |
| 3  | C | 0.055498  | 3.749993 | -0.060519 |
| 4  | C | -1.185647 | 3.063198 | -0.035408 |
| 5  | C | -1.195183 | 1.677680 | 0.007056  |
| 6  | H | 2.222613  | 3.560067 | -0.059618 |
| 7  | H | -2.117908 | 3.633894 | -0.049819 |
| 8  | N | 0.007907  | 0.952481 | 0.025447  |
| 9  | C | 2.389883  | 0.710420 | 0.026402  |
| 10 | C | 3.731712  | 1.124171 | 0.014022  |

|    |    |           |           |           |
|----|----|-----------|-----------|-----------|
| 11 | C  | 3.057571  | -1.558951 | 0.090131  |
| 12 | C  | 4.750065  | 0.166530  | 0.039743  |
| 13 | H  | 4.006643  | 2.182162  | -0.016107 |
| 14 | C  | 4.409794  | -1.188501 | 0.078017  |
| 15 | H  | 2.731424  | -2.608606 | 0.120116  |
| 16 | H  | 5.206002  | -1.936382 | 0.098358  |
| 17 | C  | -2.379285 | 0.788202  | 0.037975  |
| 18 | C  | -3.705507 | 1.248113  | 0.033001  |
| 19 | C  | -3.123442 | -1.457234 | 0.105269  |
| 20 | C  | -4.755739 | 0.325839  | 0.064451  |
| 21 | H  | -3.944707 | 2.314856  | 0.004531  |
| 22 | C  | -4.462269 | -1.039993 | 0.101158  |
| 23 | H  | -2.834393 | -2.517571 | 0.133807  |
| 24 | H  | -5.283805 | -1.759730 | 0.125808  |
| 25 | N  | 2.052654  | -0.639351 | 0.064718  |
| 26 | N  | -2.087788 | -0.572475 | 0.074623  |
| 27 | Ru | -0.023830 | -0.953103 | 0.078721  |
| 28 | C  | 0.051262  | 5.198033  | -0.106268 |
| 29 | O  | -0.863627 | 6.002425  | -0.129926 |
| 30 | O  | 1.342020  | 5.732824  | -0.125316 |
| 31 | H  | 1.322493  | 6.716961  | -0.156443 |
| 32 | C  | -6.233139 | 0.817663  | 0.059395  |
| 33 | O  | -7.097807 | -0.074984 | 0.090599  |
| 34 | O  | -6.390427 | 2.049707  | 0.024381  |
| 35 | C  | 6.244437  | 0.604157  | 0.025252  |
| 36 | O  | 7.076078  | -0.319495 | 0.051847  |
| 37 | O  | 6.447076  | 1.829825  | -0.011807 |
| 38 | N  | -0.017398 | -0.964946 | 2.130919  |
| 39 | N  | -0.029462 | -1.072553 | -1.970402 |
| 40 | N  | -0.059622 | -3.015887 | 0.135974  |
| 41 | C  | -0.028493 | -1.152954 | -3.138294 |
| 42 | C  | -0.008926 | -0.989533 | 3.301321  |
| 43 | C  | -0.078462 | -4.185600 | 0.172500  |
| 44 | S  | -0.027361 | -1.244606 | -4.774113 |
| 45 | S  | -0.104120 | -5.825405 | 0.222746  |
| 46 | S  | 0.002927  | -1.001903 | 4.939509  |

## 6 Additional Structures

Cartesian coordinates of optimized geometries at the PM6/rRu level of theory for 7 additional light-harvesting dyes. Structures in this section were used in the fitting and/or testing of the basis set for Ru, but were not used to evaluate the performance of the CI model for UV/Vis spectra.

Ru(NCN)<sub>2</sub>

|    |   |           |           |           |
|----|---|-----------|-----------|-----------|
| 1  | C | 2.646055  | 0.855320  | 0.876826  |
| 2  | C | 4.044467  | 0.847514  | 0.862813  |
| 3  | C | 4.724524  | -0.004210 | -0.023425 |
| 4  | C | 4.033880  | -0.854721 | -0.902429 |
| 5  | C | 2.635329  | -0.859954 | -0.901896 |
| 6  | H | 4.613651  | 1.492384  | 1.529215  |
| 7  | H | 5.810155  | -0.005069 | -0.029022 |
| 8  | H | 4.594856  | -1.500648 | -1.574643 |
| 9  | C | 1.945034  | -0.001807 | -0.008917 |
| 10 | C | 1.749802  | 1.659511  | 1.714766  |
| 11 | C | 2.159791  | 2.594777  | 2.682875  |
| 12 | C | -0.526467 | 2.130700  | 2.213168  |
| 13 | C | 1.204349  | 3.299509  | 3.417822  |
| 14 | H | 3.221163  | 2.761833  | 2.851616  |
| 15 | C | -0.155018 | 3.070158  | 3.185968  |
| 16 | H | -1.581018 | 1.907848  | 1.986447  |
| 17 | H | 1.518062  | 4.024450  | 4.168134  |
| 18 | H | -0.916469 | 3.606461  | 3.745640  |
| 19 | C | 1.729993  | -1.663102 | -1.730871 |
| 20 | C | 2.129546  | -2.598914 | -2.702813 |
| 21 | C | -0.551544 | -2.131666 | -2.207638 |
| 22 | C | 1.166471  | -3.302420 | -3.428623 |
| 23 | H | 3.189200  | -2.767180 | -2.881557 |
| 24 | C | -0.190481 | -3.071495 | -3.183830 |
| 25 | H | -1.603436 | -1.907417 | -1.970922 |
| 26 | H | 1.472114  | -4.027640 | -4.182042 |
| 27 | H | -0.957639 | -3.607126 | -3.736116 |
| 28 | N | 0.388358  | 1.432999  | 1.485569  |
| 29 | N | 0.371129  | -1.434985 | -1.488740 |
| 30 | C | -4.724894 | 0.004970  | 0.025135  |
| 31 | C | -4.036221 | -0.878994 | 0.872204  |
| 32 | C | -2.637667 | -0.887279 | 0.871186  |
| 33 | C | -2.644652 | 0.891433  | -0.844250 |
| 34 | C | -4.043130 | 0.886384  | -0.830217 |
| 35 | H | -5.810489 | 0.006767  | 0.031380  |
| 36 | H | -4.598781 | -1.547791 | 1.520246  |
| 37 | H | -4.611085 | 1.556034  | -1.472678 |
| 38 | C | -1.945416 | 0.001319  | 0.009904  |
| 39 | C | -1.733640 | -1.722295 | 1.669763  |
| 40 | C | -2.134894 | -2.693423 | 2.605560  |
| 41 | C | 0.546986  | -2.212091 | 2.129003  |
| 42 | C | -1.173228 | -3.425962 | 3.304339  |

|    |    |           |           |           |
|----|----|-----------|-----------|-----------|
| 43 | H  | -3.194849 | -2.866773 | 2.777296  |
| 44 | C  | 0.184079  | -3.187968 | 3.068583  |
| 45 | H  | 1.599093  | -1.980629 | 1.901330  |
| 46 | H  | -1.480497 | -4.178956 | 4.029136  |
| 47 | H  | 0.950310  | -3.745497 | 3.600289  |
| 48 | C  | -1.746917 | 1.723427  | -1.653072 |
| 49 | C  | -2.155503 | 2.692319  | -2.587947 |
| 50 | C  | 0.530149  | 2.209095  | -2.133570 |
| 51 | C  | -1.198996 | 3.421084  | -3.297737 |
| 52 | H  | -3.216686 | 2.866433  | -2.750926 |
| 53 | C  | 0.160040  | 3.182213  | -3.073166 |
| 54 | H  | 1.584297  | 1.977201  | -1.914217 |
| 55 | H  | -1.511585 | 4.171780  | -4.022815 |
| 56 | H  | 0.922208  | 3.736934  | -3.613591 |
| 57 | N  | -0.374393 | -1.487416 | 1.436542  |
| 58 | N  | -0.385922 | 1.487043  | -1.431564 |
| 59 | Ru | -0.000164 | -0.000474 | 0.000529  |

[Ru(DQB)<sub>2</sub>]

|    |   |           |           |           |
|----|---|-----------|-----------|-----------|
| 1  | C | -2.632893 | -1.272834 | 3.192486  |
| 2  | C | -3.769669 | -0.525783 | 3.025436  |
| 3  | C | -3.761896 | 0.568399  | 2.102102  |
| 4  | C | -2.548276 | 0.889077  | 1.422179  |
| 5  | C | -1.500927 | -1.003078 | 2.367384  |
| 6  | H | -5.866271 | 1.051465  | 2.339330  |
| 7  | H | -2.579885 | -2.092291 | 3.906499  |
| 8  | H | -4.681081 | -0.742117 | 3.579860  |
| 9  | C | -4.939402 | 1.329107  | 1.843678  |
| 10 | C | -2.458161 | 2.128670  | 0.678924  |
| 11 | H | -0.621909 | -1.669030 | 2.408391  |
| 12 | C | -3.649343 | 2.789531  | 0.404711  |
| 13 | C | -4.886220 | 2.383351  | 0.965089  |
| 14 | H | -3.645794 | 3.670405  | -0.238648 |
| 15 | H | -5.785625 | 2.943667  | 0.711008  |
| 16 | C | 4.885197  | 2.387111  | -0.964849 |
| 17 | C | 4.940272  | 1.330658  | -1.840640 |
| 18 | C | 3.763610  | 0.568767  | -2.099078 |
| 19 | C | 2.548794  | 0.889855  | -1.421504 |
| 20 | C | 2.457151  | 2.130712  | -0.680140 |
| 21 | C | 3.647428  | 2.793501  | -0.406628 |
| 22 | H | 4.685644  | -0.744464 | -3.572626 |
| 23 | H | 5.783812  | 2.948923  | -0.711004 |
| 24 | H | 5.868178  | 1.052223  | -2.334080 |
| 25 | C | 3.773220  | -0.527287 | -3.020141 |

|    |   |           |           |           |
|----|---|-----------|-----------|-----------|
| 26 | H | 3.642591  | 3.675914  | 0.234573  |
| 27 | C | 1.503501  | -1.004038 | -2.365462 |
| 28 | C | 2.637097  | -1.274992 | -3.187820 |
| 29 | H | 0.624298  | -1.669980 | -2.406731 |
| 30 | H | 2.585933  | -2.095611 | -3.900609 |
| 31 | C | 1.151110  | 4.179339  | -0.349539 |
| 32 | C | -1.154184 | 4.178251  | 0.346724  |
| 33 | H | 2.035156  | 4.742463  | -0.648665 |
| 34 | H | -2.039021 | 4.740518  | 0.645018  |
| 35 | N | -1.458137 | 0.005961  | 1.479369  |
| 36 | N | 1.458929  | 0.006564  | -1.479231 |
| 37 | C | 2.636357  | 1.275930  | 3.187255  |
| 38 | C | 3.772746  | 0.528408  | 3.019808  |
| 39 | C | 3.763546  | -0.567837 | 2.099072  |
| 40 | C | 2.549003  | -0.889463 | 1.421088  |
| 41 | C | 1.502727  | 1.004268  | 2.365012  |
| 42 | H | 5.867706  | -1.051924 | 2.335781  |
| 43 | H | 2.584998  | 2.096698  | 3.899939  |
| 44 | H | 4.684969  | 0.745940  | 3.572562  |
| 45 | C | 4.940108  | -1.330222 | 1.841838  |
| 46 | C | 2.457765  | -2.130250 | 0.680100  |
| 47 | H | 0.623262  | 1.669541  | 2.407076  |
| 48 | C | 3.648012  | -2.793191 | 0.407463  |
| 49 | C | 4.885532  | -2.387120 | 0.966604  |
| 50 | H | 3.643483  | -3.675718 | -0.233427 |
| 51 | H | 5.784072  | -2.949524 | 0.713961  |
| 52 | C | -4.885364 | -2.386161 | -0.965768 |
| 53 | C | -4.940022 | -1.330063 | -1.842154 |
| 54 | C | -3.763195 | -0.568296 | -2.100416 |
| 55 | C | -2.548753 | -0.889432 | -1.422098 |
| 56 | C | -2.457398 | -2.129931 | -0.680652 |
| 57 | C | -3.647704 | -2.792651 | -0.407237 |
| 58 | H | -4.684265 | 0.743828  | -3.575694 |
| 59 | H | -5.784068 | -2.947770 | -0.712006 |
| 60 | H | -5.867996 | -1.051743 | -2.335771 |
| 61 | C | -3.772330 | 0.527074  | -3.022189 |
| 62 | H | -3.643064 | -3.675339 | 0.233615  |
| 63 | C | -1.502884 | 1.004300  | -2.366329 |
| 64 | C | -2.636009 | 1.275022  | -3.189421 |
| 65 | H | -0.623652 | 1.670291  | -2.407485 |
| 66 | H | -2.584233 | 2.095148  | -3.902731 |
| 67 | C | -1.151912 | -4.178923 | -0.350948 |
| 68 | C | 1.152610  | -4.179102 | 0.347653  |
| 69 | H | -2.035851 | -4.741484 | -0.651241 |
| 70 | H | 2.036681  | -4.742129 | 0.646877  |

|    |    |           |           |           |
|----|----|-----------|-----------|-----------|
| 71 | N  | 1.458680  | -0.006245 | 1.478789  |
| 72 | N  | -1.458711 | -0.006131 | -1.479899 |
| 73 | Ru | -0.000082 | -0.000133 | -0.000318 |
| 74 | C  | 1.172725  | -2.769519 | 0.321934  |
| 75 | C  | -1.172239 | -2.769509 | -0.323030 |
| 76 | C  | -1.173429 | 2.768799  | 0.320737  |
| 77 | C  | 1.171810  | 2.769881  | -0.322617 |
| 78 | C  | 0.000537  | -4.882531 | -0.002273 |
| 79 | H  | 0.000029  | -5.967650 | -0.003354 |
| 80 | C  | -0.001965 | 4.882347  | -0.001703 |
| 81 | H  | -0.002606 | 5.967473  | -0.001986 |
| 82 | C  | 0.000143  | -2.044534 | -0.000216 |
| 83 | C  | -0.000400 | 2.044293  | -0.000772 |

[Ru(DQIm)<sub>2</sub>]<sup>2+</sup>

|    |   |           |           |           |
|----|---|-----------|-----------|-----------|
| 1  | C | 2.837585  | 1.154444  | -3.095231 |
| 2  | C | 3.876095  | 0.265671  | -3.017650 |
| 3  | C | 3.740847  | -0.905944 | -2.202871 |
| 4  | C | 2.515617  | -1.123835 | -1.501040 |
| 5  | C | 1.683284  | 0.938591  | -2.284981 |
| 6  | H | 5.746925  | -1.640147 | -2.629730 |
| 7  | H | 2.876855  | 2.032754  | -3.746069 |
| 8  | H | 4.803766  | 0.418905  | -3.580402 |
| 9  | C | 4.805264  | -1.851305 | -2.111877 |
| 10 | C | 2.337134  | -2.415574 | -0.869052 |
| 11 | H | 0.864369  | 1.677933  | -2.312546 |
| 12 | C | 3.396365  | -3.304040 | -0.785650 |
| 13 | C | 4.644310  | -3.008969 | -1.392192 |
| 14 | H | 3.293253  | -4.264416 | -0.270322 |
| 15 | H | 5.461466  | -3.733331 | -1.296663 |
| 16 | C | -4.644932 | -3.008762 | 1.390167  |
| 17 | C | -4.804912 | -1.852222 | 2.111938  |
| 18 | C | -3.740135 | -0.907238 | 2.203285  |
| 19 | C | -2.515483 | -1.124566 | 1.500215  |
| 20 | C | -2.337553 | -2.415663 | 0.866820  |
| 21 | C | -3.397481 | -3.303385 | 0.782568  |
| 22 | H | -4.802203 | 0.416439  | 3.582827  |
| 23 | H | -5.462586 | -3.732362 | 1.293856  |
| 24 | H | -5.746106 | -1.641516 | 2.630987  |
| 25 | C | -3.874790 | 0.263734  | 3.019147  |
| 26 | H | -3.294689 | -4.263199 | 0.266057  |
| 27 | C | -1.682600 | 0.937357  | 2.285218  |
| 28 | C | -2.836361 | 1.152551  | 3.096377  |
| 29 | H | -0.863880 | 1.676884  | 2.312354  |



|    |    |           |           |           |
|----|----|-----------|-----------|-----------|
| 30 | H  | -2.875359 | 2.030697  | 3.747498  |
| 31 | C  | -0.643693 | -4.200592 | 0.231348  |
| 32 | C  | 0.642375  | -4.200483 | -0.235768 |
| 33 | H  | -1.286357 | -5.031686 | 0.482628  |
| 34 | H  | 1.284324  | -5.031414 | -0.488397 |
| 35 | N  | 1.525311  | -0.120750 | -1.472487 |
| 36 | N  | -1.525233 | -0.121295 | 1.471758  |
| 37 | C  | 2.836576  | -1.153740 | 3.096691  |
| 38 | C  | 3.875098  | -0.264871 | 3.020096  |
| 39 | C  | 3.740776  | 0.906039  | 2.204181  |
| 40 | C  | 2.516279  | 1.123300  | 1.500750  |
| 41 | C  | 1.683324  | -0.938573 | 2.285002  |
| 42 | H  | 5.746320  | 1.640755  | 2.632989  |
| 43 | H  | 2.875331  | -2.032194 | 3.747495  |
| 44 | H  | 4.802222  | -0.417778 | 3.583988  |
| 45 | C  | 4.805534  | 1.851160  | 2.113188  |
| 46 | C  | 2.338720  | 2.414562  | 0.867294  |
| 47 | H  | 0.864574  | -1.678299 | 2.311689  |
| 48 | C  | 3.398795  | 3.302086  | 0.782626  |
| 49 | C  | 4.646125  | 3.007234  | 1.390630  |
| 50 | H  | 3.296769  | 4.261354  | 0.264872  |
| 51 | H  | 5.463983  | 3.730660  | 1.294177  |
| 52 | C  | -4.643857 | 3.009856  | -1.389160 |
| 53 | C  | -4.804124 | 1.853709  | -2.111306 |
| 54 | C  | -3.739704 | 0.908385  | -2.203424 |
| 55 | C  | -2.514736 | 1.124946  | -1.500541 |
| 56 | C  | -2.336363 | 2.416187  | -0.866844 |
| 57 | C  | -3.395940 | 3.304264  | -0.782060 |
| 58 | H  | -4.802951 | -0.414428 | -3.582860 |
| 59 | H  | -5.461433 | 3.733505  | -1.292188 |
| 60 | H  | -5.745449 | 1.643440  | -2.630158 |
| 61 | C  | -3.875239 | -0.262218 | -3.019328 |
| 62 | H  | -3.293224 | 4.263830  | -0.264807 |
| 63 | C  | -1.683565 | -0.937443 | -2.285704 |
| 64 | C  | -2.837398 | -1.151931 | -3.096608 |
| 65 | H  | -0.865474 | -1.677582 | -2.312665 |
| 66 | H  | -2.877256 | -2.030019 | -3.747661 |
| 67 | C  | -0.641346 | 4.200474  | -0.232944 |
| 68 | C  | 0.645062  | 4.199941  | 0.233341  |
| 69 | H  | -1.283723 | 5.031572  | -0.484380 |
| 70 | H  | 1.288627  | 5.030951  | 0.484107  |
| 71 | N  | 1.526037  | 0.120210  | 1.471587  |
| 72 | N  | -1.525383 | 0.121090  | -1.471929 |
| 73 | Ru | 0.000141  | -0.000239 | -0.000352 |
| 74 | N  | -1.051362 | -2.828838 | 0.372562  |

|    |   |           |           |           |
|----|---|-----------|-----------|-----------|
| 75 | N | -1.049716 | 2.828856  | -0.373106 |
| 76 | N | 1.050366  | -2.828684 | -0.375597 |
| 77 | N | 1.052374  | 2.827944  | 0.373457  |
| 78 | C | 0.001032  | 1.980163  | 0.000259  |
| 79 | C | -0.000299 | -1.980501 | -0.000858 |

[Ru(DQPFur)<sub>2</sub>]<sup>2+</sup>

|    |   |           |           |           |
|----|---|-----------|-----------|-----------|
| 1  | C | 1.308302  | -2.640952 | 3.219688  |
| 2  | C | 0.614976  | -3.802697 | 2.990868  |
| 3  | C | -0.445736 | -3.811351 | 2.030072  |
| 4  | C | -0.802539 | -2.587831 | 1.388994  |
| 5  | C | 1.016314  | -1.494132 | 2.425199  |
| 6  | H | -0.844417 | -5.950949 | 2.165338  |
| 7  | H | 2.094948  | -2.580215 | 3.976691  |
| 8  | C | -1.140666 | -5.011768 | 1.688249  |
| 9  | C | -2.012141 | -2.528262 | 0.605672  |
| 10 | H | 1.628722  | -0.582766 | 2.527587  |
| 11 | C | -2.606979 | -3.729662 | 0.247492  |
| 12 | C | -2.156064 | -4.973493 | 0.765989  |
| 13 | H | -3.473198 | -3.745653 | -0.423246 |
| 14 | H | -2.664044 | -5.890756 | 0.451211  |
| 15 | C | -2.581406 | 4.768329  | -0.747713 |
| 16 | C | -1.568001 | 4.896383  | -1.664041 |
| 17 | C | -0.770196 | 3.761022  | -2.003543 |
| 18 | C | -1.020785 | 2.510153  | -1.364544 |
| 19 | C | -2.222300 | 2.344839  | -0.584256 |
| 20 | C | -2.923861 | 3.489259  | -0.231541 |
| 21 | H | -3.171780 | 5.636526  | -0.436826 |
| 22 | H | -1.353396 | 5.858195  | -2.139921 |
| 23 | C | 0.287539  | 3.843811  | -2.963782 |
| 24 | H | -3.795275 | 3.428849  | 0.431036  |
| 25 | C | 0.883920  | 1.576366  | -2.403588 |
| 26 | C | 1.076363  | 2.745216  | -3.196156 |
| 27 | H | 1.570500  | 0.719860  | -2.509284 |
| 28 | H | 1.863308  | 2.752424  | -3.954947 |
| 29 | C | -2.747598 | -1.269635 | 0.302126  |
| 30 | C | -2.846208 | 1.027609  | -0.279940 |
| 31 | C | -4.248850 | 0.967464  | -0.330707 |
| 32 | C | -4.928106 | -0.214204 | 0.011609  |
| 33 | C | -4.153161 | -1.333028 | 0.353349  |
| 34 | H | -4.840709 | 1.838382  | -0.641452 |
| 35 | H | -4.654149 | -2.254169 | 0.665854  |
| 36 | N | 0.025785  | -1.461948 | 1.514945  |
| 37 | N | -2.086406 | -0.091719 | 0.011787  |

|    |    |           |           |           |
|----|----|-----------|-----------|-----------|
| 38 | N  | -0.099819 | 1.458894  | -1.492972 |
| 39 | C  | -1.083767 | -2.746832 | -3.192285 |
| 40 | C  | -0.295909 | -3.845922 | -2.959468 |
| 41 | C  | 0.763996  | -3.762066 | -2.001504 |
| 42 | C  | 1.017010  | -2.511011 | -1.363881 |
| 43 | C  | -0.888815 | -1.577181 | -2.401649 |
| 44 | H  | 1.345528  | -5.859527 | -2.137614 |
| 45 | H  | -1.872063 | -2.754230 | -3.949665 |
| 46 | C  | 1.561938  | -4.897689 | -1.663098 |
| 47 | C  | 2.219990  | -2.346095 | -0.585383 |
| 48 | H  | -1.574849 | -0.720008 | -2.507579 |
| 49 | C  | 2.921028  | -3.491014 | -0.233370 |
| 50 | C  | 2.577535  | -4.769845 | -0.749033 |
| 51 | H  | 3.793033  | -3.430623 | 0.428271  |
| 52 | H  | 3.167819  | -5.638447 | -0.439324 |
| 53 | C  | 2.153662  | 4.974250  | 0.757049  |
| 54 | C  | 1.137339  | 5.013646  | 1.678318  |
| 55 | C  | 0.443203  | 3.813366  | 2.022163  |
| 56 | C  | 0.801291  | 2.588687  | 1.383957  |
| 57 | C  | 2.010040  | 2.528584  | 0.599597  |
| 58 | C  | 2.605014  | 3.729762  | 0.240421  |
| 59 | H  | 2.661468  | 5.891035  | 0.440942  |
| 60 | H  | 0.840364  | 5.953811  | 2.153272  |
| 61 | C  | -0.617616 | 3.805379  | 2.982782  |
| 62 | H  | 3.471812  | 3.745460  | -0.429531 |
| 63 | C  | -1.013496 | 1.493630  | 2.426368  |
| 64 | C  | -1.307216 | 2.642467  | 3.217076  |
| 65 | H  | -1.623060 | 0.580740  | 2.532914  |
| 66 | H  | -2.092862 | 2.582421  | 3.975102  |
| 67 | C  | 2.844846  | -1.028980 | -0.282036 |
| 68 | C  | 2.745249  | 1.269315  | 0.297077  |
| 69 | C  | 4.150791  | 1.333173  | 0.348231  |
| 70 | C  | 4.926191  | 0.213948  | 0.008951  |
| 71 | C  | 4.247491  | -0.968475 | -0.331883 |
| 72 | H  | 4.651499  | 2.255044  | 0.659278  |
| 73 | H  | 4.839948  | -1.839628 | -0.640725 |
| 74 | N  | 0.095904  | -1.459770 | -1.491947 |
| 75 | N  | 2.084763  | 0.090657  | 0.008590  |
| 76 | N  | -0.024791 | 1.461844  | 1.513986  |
| 77 | Ru | -0.000693 | -0.000487 | 0.010568  |
| 78 | C  | -6.370626 | -0.274859 | 0.011785  |
| 79 | C  | -7.313395 | -1.249126 | 0.276620  |
| 80 | C  | -8.602472 | -0.648871 | 0.089715  |
| 81 | C  | -8.384797 | 0.656703  | -0.278742 |
| 82 | O  | -7.022488 | 0.932709  | -0.339292 |

|    |   |           |           |           |
|----|---|-----------|-----------|-----------|
| 83 | H | -7.146515 | -2.270643 | 0.570282  |
| 84 | H | -9.549876 | -1.147410 | 0.218787  |
| 85 | H | -8.998189 | 1.500876  | -0.527162 |
| 86 | C | 8.383486  | -0.656065 | -0.276180 |
| 87 | C | 8.600013  | 0.651940  | 0.084374  |
| 88 | C | 7.310522  | 1.251939  | 0.268696  |
| 89 | C | 6.368630  | 0.275263  | 0.009794  |
| 90 | O | 7.021511  | -0.933752 | -0.334348 |
| 91 | H | 8.997305  | -1.501108 | -0.519994 |
| 92 | H | 9.547242  | 1.151599  | 0.210983  |
| 93 | H | 7.142713  | 2.274944  | 0.556344  |
| 94 | H | -0.453867 | -4.785240 | -3.499016 |
| 95 | H | 0.443722  | 4.782431  | -3.505324 |
| 96 | H | 0.850211  | -4.723616 | 3.533779  |
| 97 | H | -0.855765 | 4.727946  | 3.522013  |

[Ru(DQPl)<sub>2</sub>]<sup>2+</sup>

|    |   |           |           |           |
|----|---|-----------|-----------|-----------|
| 1  | C | 2.754639  | -1.219827 | -3.112484 |
| 2  | C | 3.835411  | -0.378678 | -3.011952 |
| 3  | C | 3.751089  | 0.777408  | -2.174669 |
| 4  | C | 2.535786  | 1.038959  | -1.472105 |
| 5  | C | 1.603476  | -0.964188 | -2.319285 |
| 6  | H | 5.787153  | 1.449539  | -2.566633 |
| 7  | H | 2.764425  | -2.090726 | -3.775130 |
| 8  | H | 4.757758  | -0.567517 | -3.573206 |
| 9  | C | 4.852491  | 1.676604  | -2.044517 |
| 10 | C | 2.380674  | 2.300569  | -0.786764 |
| 11 | H | 0.749623  | -1.666416 | -2.362965 |
| 12 | C | 3.485791  | 3.130742  | -0.672125 |
| 13 | C | 4.727912  | 2.810000  | -1.280410 |
| 14 | H | 3.409742  | 4.077192  | -0.124926 |
| 15 | H | 5.570979  | 3.498501  | -1.154790 |
| 16 | C | -4.725572 | 2.816689  | 1.294180  |
| 17 | C | -4.848913 | 1.683319  | 2.058540  |
| 18 | C | -3.748762 | 0.782053  | 2.184075  |
| 19 | C | -2.535511 | 1.041714  | 1.477288  |
| 20 | C | -2.380738 | 2.303279  | 0.791788  |
| 21 | C | -3.485066 | 3.135192  | 0.681462  |
| 22 | H | -4.753507 | -0.561326 | 3.585440  |
| 23 | H | -5.568169 | 3.506134  | 1.171754  |
| 24 | H | -5.781885 | 1.457741  | 2.584223  |
| 25 | C | -3.832757 | -0.374431 | 3.020861  |
| 26 | H | -3.409323 | 4.081835  | 0.134606  |
| 27 | C | -1.604894 | -0.964408 | 2.319810  |

|    |   |           |           |           |
|----|---|-----------|-----------|-----------|
| 28 | C | -2.753895 | -1.218520 | 3.116540  |
| 29 | H | -0.752573 | -1.668768 | 2.359581  |
| 30 | H | -2.763498 | -2.090413 | 3.777917  |
| 31 | C | -0.683231 | 4.127771  | 0.205454  |
| 32 | C | 0.681747  | 4.126997  | -0.210824 |
| 33 | H | -1.268688 | 5.009179  | 0.400927  |
| 34 | H | 1.266937  | 5.007625  | -0.410425 |
| 35 | N | 1.493861  | 0.092737  | -1.485182 |
| 36 | N | -1.495522 | 0.093153  | 1.486506  |
| 37 | C | -2.755733 | 1.221607  | -3.112421 |
| 38 | C | -3.835779 | 0.379343  | -3.014449 |
| 39 | C | -3.751565 | -0.777959 | -2.178732 |
| 40 | C | -2.537260 | -1.039481 | -1.474530 |
| 41 | C | -1.605709 | 0.966001  | -2.317622 |
| 42 | H | -5.786433 | -1.450696 | -2.574556 |
| 43 | H | -2.765136 | 2.093134  | -3.774287 |
| 44 | H | -4.757637 | 0.567898  | -3.576635 |
| 45 | C | -4.852419 | -1.678083 | -2.051485 |
| 46 | C | -2.382100 | -2.301934 | -0.790878 |
| 47 | H | -0.752269 | 1.668953  | -2.359061 |
| 48 | C | -3.486470 | -3.133597 | -0.680136 |
| 49 | C | -4.728004 | -2.813176 | -1.289819 |
| 50 | H | -3.410225 | -4.081366 | -0.135202 |
| 51 | H | -5.570421 | -3.502785 | -1.167184 |
| 52 | C | 4.726479  | -2.813100 | 1.282211  |
| 53 | C | 4.850710  | -1.679915 | 2.046852  |
| 54 | C | 3.749418  | -0.780678 | 2.177025  |
| 55 | C | 2.534783  | -1.041570 | 1.473236  |
| 56 | C | 2.379498  | -2.302862 | 0.787524  |
| 57 | C | 3.484381  | -3.133473 | 0.673642  |
| 58 | H | 4.754960  | 0.562374  | 3.578232  |
| 59 | H | 5.569429  | -3.501566 | 1.156935  |
| 60 | H | 5.785100  | -1.453252 | 2.569569  |
| 61 | C | 3.833103  | 0.374576  | 3.015823  |
| 62 | H | 3.408004  | -4.080402 | 0.127413  |
| 63 | C | 1.602125  | 0.961200  | 2.321271  |
| 64 | C | 2.752380  | 1.215694  | 3.116304  |
| 65 | H | 0.748386  | 1.663662  | 2.364253  |
| 66 | H | 2.761402  | 2.085787  | 3.780104  |
| 67 | C | 0.680603  | -4.128097 | 0.206903  |
| 68 | C | -0.684525 | -4.127592 | -0.209028 |
| 69 | H | 1.265460  | -5.009365 | 0.404369  |
| 70 | H | -1.269454 | -5.008728 | -0.406439 |
| 71 | N | -1.496213 | -0.092142 | -1.485082 |
| 72 | N | 1.493093  | -0.094935 | 1.486304  |

|    |    |           |           |           |
|----|----|-----------|-----------|-----------|
| 73 | Ru | -0.001288 | -0.000218 | 0.000497  |
| 74 | N  | -0.001421 | -1.940888 | -0.000836 |
| 75 | N  | -0.000514 | 1.940317  | 0.001735  |
| 76 | C  | -1.088703 | 2.796554  | 0.322234  |
| 77 | C  | 1.087515  | 2.795430  | -0.321734 |
| 78 | C  | 1.086609  | -2.796776 | 0.320941  |
| 79 | C  | -1.089666 | -2.796135 | -0.323328 |

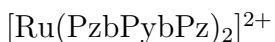

|    |    |           |           |           |
|----|----|-----------|-----------|-----------|
| 1  | C  | -1.924819 | 3.083188  | 3.884591  |
| 2  | C  | -2.843641 | 1.456470  | 5.376211  |
| 3  | H  | -1.707753 | 4.126198  | 3.625437  |
| 4  | H  | -3.392317 | 1.202194  | 6.290856  |
| 5  | C  | -0.732531 | -3.933301 | -1.210113 |
| 6  | C  | 1.311192  | -4.084788 | 0.018822  |
| 7  | H  | -1.372422 | -4.252216 | -2.041458 |
| 8  | H  | 2.287690  | -4.551746 | 0.193917  |
| 9  | Ru | -1.053554 | -0.870705 | 2.019903  |
| 10 | C  | 0.864110  | -3.032893 | 0.841059  |
| 11 | C  | -1.165627 | -2.934932 | -0.317490 |
| 12 | C  | -2.373786 | 0.442904  | 4.520148  |
| 13 | C  | -1.530481 | 2.037747  | 3.029447  |
| 14 | C  | 0.514059  | -4.531870 | -1.033278 |
| 15 | H  | 0.856919  | -5.331503 | -1.702372 |
| 16 | C  | -2.604461 | 2.794585  | 5.067075  |
| 17 | H  | -2.941604 | 3.597580  | 5.735137  |
| 18 | N  | -1.726579 | 0.705330  | 3.330175  |
| 19 | N  | -0.378974 | -2.449597 | 0.707367  |
| 20 | N  | -3.005497 | -1.964973 | 4.062355  |
| 21 | C  | -3.832607 | -3.059085 | 4.429198  |
| 22 | C  | -2.520516 | -3.600172 | 2.676169  |
| 23 | C  | -3.562684 | -4.081129 | 3.536401  |
| 24 | H  | -4.548719 | -3.005214 | 5.236957  |
| 25 | H  | -2.039783 | -4.152904 | 1.882395  |
| 26 | H  | -4.029940 | -5.052448 | 3.484126  |
| 27 | N  | 0.245760  | 1.757049  | 1.252632  |
| 28 | C  | 1.273053  | 2.385952  | 0.501262  |
| 29 | C  | 1.134412  | 0.193184  | -0.009516 |
| 30 | C  | 1.865813  | 1.399940  | -0.267456 |
| 31 | H  | 1.515584  | 3.433998  | 0.605890  |
| 32 | H  | 1.304051  | -0.768495 | -0.470934 |
| 33 | H  | 2.707880  | 1.500181  | -0.934933 |
| 34 | N  | -2.864119 | -1.054010 | -0.399321 |
| 35 | C  | -3.916487 | -0.437180 | -1.130583 |

|    |   |           |           |           |
|----|---|-----------|-----------|-----------|
| 36 | C | -4.349560 | 0.639662  | -0.379504 |
| 37 | H | -4.223983 | -0.778593 | -2.108833 |
| 38 | C | -3.586514 | 0.616321  | 0.836281  |
| 39 | H | -5.109238 | 1.361963  | -0.636493 |
| 40 | H | -3.692187 | 1.295488  | 1.669916  |
| 41 | N | 1.400332  | -2.208435 | 3.180326  |
| 42 | C | 2.237099  | -2.341634 | 4.322129  |
| 43 | C | 1.808658  | -1.405203 | 5.244775  |
| 44 | H | 3.008387  | -3.095424 | 4.394554  |
| 45 | C | 0.750479  | -0.670403 | 4.612028  |
| 46 | H | 2.184059  | -1.241540 | 6.243358  |
| 47 | H | 0.211084  | 0.164660  | 5.035077  |
| 48 | N | 0.535639  | -1.139295 | 3.351282  |
| 49 | N | 0.132331  | 0.427363  | 0.883897  |
| 50 | N | -2.164307 | -2.331880 | 3.025587  |
| 51 | N | -2.717191 | -0.432150 | 0.830454  |
| 52 | C | -0.977796 | 2.463958  | 1.685411  |
| 53 | C | -2.514119 | -0.972279 | 5.041307  |
| 54 | H | -0.747201 | 3.565162  | 1.705326  |
| 55 | H | -1.783646 | 2.342163  | 0.907203  |
| 56 | H | -1.520189 | -1.305683 | 5.454671  |
| 57 | H | -3.219647 | -0.980798 | 5.918093  |
| 58 | C | -2.610847 | -2.509637 | -0.470000 |
| 59 | C | 1.890185  | -2.490577 | 1.813662  |
| 60 | H | -3.005703 | -2.874367 | -1.458799 |
| 61 | H | -3.224701 | -3.040753 | 0.312093  |
| 62 | H | 2.740576  | -3.222555 | 1.904482  |
| 63 | H | 2.343087  | -1.557373 | 1.372734  |

[Ru(CPyC)(TPy)]<sup>2+</sup>

|    |   |           |          |          |
|----|---|-----------|----------|----------|
| 1  | C | 0.333095  | 2.929722 | 0.520744 |
| 2  | C | 0.172292  | 4.315290 | 0.667966 |
| 3  | C | -1.121091 | 4.839754 | 0.786899 |
| 4  | C | -2.240664 | 3.998284 | 0.759045 |
| 5  | C | -2.050166 | 2.616633 | 0.610931 |
| 6  | H | 1.040005  | 4.978222 | 0.689769 |
| 7  | H | -3.245678 | 4.415740 | 0.851860 |
| 8  | N | -0.772353 | 2.097327 | 0.495391 |
| 9  | C | 1.599427  | 2.179202 | 0.376712 |
| 10 | C | 2.868730  | 2.782898 | 0.364637 |
| 11 | C | 2.581347  | 0.040412 | 0.106907 |
| 12 | C | 4.006482  | 1.986348 | 0.220001 |
| 13 | H | 2.964159  | 3.866830 | 0.467511 |
| 14 | C | 3.864168  | 0.599492 | 0.089126 |

|    |    |           |           |           |
|----|----|-----------|-----------|-----------|
| 15 | H  | 2.417035  | -1.042631 | 0.008042  |
| 16 | H  | 4.743403  | -0.041035 | -0.025491 |
| 17 | C  | -3.088810 | 1.564277  | 0.557569  |
| 18 | C  | -4.467327 | 1.821918  | 0.652158  |
| 19 | C  | -3.508957 | -0.757701 | 0.348970  |
| 20 | C  | -5.371375 | 0.759123  | 0.592816  |
| 21 | H  | -4.829140 | 2.846414  | 0.771365  |
| 22 | C  | -4.889527 | -0.546594 | 0.439454  |
| 23 | H  | -3.081887 | -1.763901 | 0.227830  |
| 24 | H  | -5.581402 | -1.392382 | 0.390568  |
| 25 | N  | 1.453620  | 0.799973  | 0.247653  |
| 26 | N  | -2.605658 | 0.266767  | 0.404950  |
| 27 | Ru | -0.529182 | 0.165832  | 0.288362  |
| 28 | C  | -0.375362 | -0.411837 | 2.262448  |
| 29 | C  | -0.578197 | 0.003536  | -1.766988 |
| 30 | N  | -0.295278 | -1.867444 | 0.068311  |
| 31 | H  | -1.258819 | 5.919118  | 0.902628  |
| 32 | H  | -6.448430 | 0.945194  | 0.665992  |
| 33 | H  | 5.002407  | 2.442364  | 0.209040  |
| 34 | C  | -0.209666 | -1.843518 | 2.376173  |
| 35 | N  | -0.353180 | 0.015030  | 3.584723  |
| 36 | N  | -0.105541 | -2.141504 | 3.740007  |
| 37 | N  | -0.191775 | -1.028793 | 4.464249  |
| 38 | C  | -0.437082 | -1.373768 | -2.183349 |
| 39 | N  | -0.681052 | 0.689354  | -2.971430 |
| 40 | N  | -0.615451 | -0.153346 | -4.055194 |
| 41 | N  | -0.468958 | -1.388405 | -3.582849 |
| 42 | C  | -0.288656 | -2.429908 | -1.198761 |
| 43 | C  | -0.169842 | -2.675676 | 1.187679  |
| 44 | C  | -0.034288 | -4.063876 | 1.056087  |
| 45 | C  | -0.027538 | -4.623113 | -0.228470 |
| 46 | C  | -0.154342 | -3.814477 | -1.365606 |
| 47 | H  | 0.063570  | -4.705613 | 1.930426  |
| 48 | H  | -0.148953 | -4.264203 | -2.357352 |
| 49 | H  | 0.077095  | -5.707560 | -0.345377 |
| 50 | C  | -0.361084 | -2.531946 | -4.498438 |
| 51 | H  | -0.424468 | -2.207387 | -5.563652 |
| 52 | H  | -1.184164 | -3.254595 | -4.327279 |
| 53 | H  | 0.611525  | -3.048856 | -4.371221 |
| 54 | C  | 0.074704  | -3.446711 | 4.389346  |
| 55 | H  | -0.769920 | -4.125031 | 4.153537  |
| 56 | H  | 0.116493  | -3.346742 | 5.499407  |
| 57 | H  | 1.024500  | -3.919724 | 4.067464  |
| 58 | C  | -0.835841 | 2.105312  | -3.238242 |
| 59 | C  | -0.464554 | 1.347189  | 4.143408  |



|    |   |           |          |           |
|----|---|-----------|----------|-----------|
| 60 | C | -1.741280 | 1.850325 | 4.494044  |
| 61 | C | 0.314935  | 2.900931 | -3.460154 |
| 62 | C | -2.137140 | 2.652745 | -3.354213 |
| 63 | C | 0.711883  | 2.092395 | 4.404077  |
| 64 | C | -1.825655 | 3.119769 | 5.070357  |
| 65 | C | -2.974590 | 1.041382 | 4.274479  |
| 66 | C | 0.145123  | 4.253979 | -3.761653 |
| 67 | C | -1.137763 | 4.815359 | -3.879282 |
| 68 | H | 1.020460  | 4.880390 | -3.942099 |
| 69 | C | -2.267640 | 4.009666 | -3.656797 |
| 70 | C | -3.348961 | 1.801916 | -3.177401 |
| 71 | C | -0.670582 | 3.876139 | 5.331361  |
| 72 | H | -2.800979 | 3.519638 | 5.353138  |
| 73 | C | 0.588062  | 3.358207 | 4.980505  |
| 74 | C | 2.060844  | 1.538380 | 4.092034  |
| 75 | C | -0.776075 | 5.214378 | 5.971437  |
| 76 | H | 1.484033  | 3.943994 | 5.193602  |
| 77 | H | -3.262677 | 4.447114 | -3.755361 |
| 78 | C | -1.300082 | 6.250117 | -4.234846 |
| 79 | C | 1.683374  | 2.311682 | -3.396433 |
| 80 | H | 1.838581  | 1.692850 | -2.503734 |
| 81 | H | 2.474417  | 3.078050 | -3.402760 |
| 82 | H | 1.873157  | 1.677117 | -4.280547 |
| 83 | H | -3.302770 | 1.182371 | -2.272585 |
| 84 | H | -3.477889 | 1.125014 | -4.040582 |
| 85 | H | -4.276044 | 2.393731 | -3.120096 |
| 86 | H | -3.020070 | 0.601189 | 3.270070  |
| 87 | H | -3.896201 | 1.627517 | 4.415641  |
| 88 | H | -3.029869 | 0.214112 | 5.004291  |
| 89 | H | 2.116389  | 1.091486 | 3.091531  |
| 90 | H | 2.337373  | 0.757742 | 4.823366  |
| 91 | H | 2.854966  | 2.299135 | 4.152602  |
| 92 | H | -1.686623 | 5.330431 | 6.580529  |
| 93 | H | -0.792393 | 6.022064 | 5.222752  |
| 94 | H | 0.069496  | 5.428931 | 6.645505  |
| 95 | H | -0.466233 | 6.638541 | -4.841485 |
| 96 | H | -1.359255 | 6.885792 | -3.337156 |
| 97 | H | -2.215300 | 6.444012 | -4.817574 |
